# Supplementary material for: Coupled Downscaled Climate Models and Ecophysiological Metrics Forecast Habitat Compression for an Endangered Estuarine Fish
Source: PubMed Central journal article supplement (PMC4721863; doi:10.1371/journal.pone.0146724), 2016-01-21

## **S1 Appendix. Methods and results for measurements of north Delta water temperature**

Because of differences in sensor depth between the North Delta water temperature stations (Table 1) and the other water temperature stations (depth of 1 m) used in this study, we measured vertical profiles of water temperature at a number of locations in the North Delta (Fig 1). Our purpose was to determine if the different sensor depths would likely produce data that would introduce large biases into our water temperature models. We also wanted to determine if persistent thermal stratification occurred in the North Delta or the Sacramento River, which might provide a possible temperature refuge for our test organism, Delta Smelt. Temperatures were measured primarily with a YSI EXO2 multiparameter sonde with a temperature response of less than 1 second. An RBR concerto Conductivity-Temperature-Depth profiling unit with temperature response of 0.1 second was used in a few cases. Limited side-by-side comparisons indicated no differences in measured water temperatures between the two instruments.

**Table 1. Site names from main article, average depth of sensors for North Delta locations where water temperature models were developed, and nearest location where water temperature profiles were collected (see Fig 1).**

| Site name                               | Average depth of sensor (m) | Nearest vertical profile location |
|-----------------------------------------|-----------------------------|-----------------------------------|
| Miners Slough                           | 3.7                         | 11                                |
| Sacramento River deepwater ship channel | 1.6                         | 56, 62                            |
| Lower Cache Slough                      | 2.7                         | 44                                |
| Upper Cache Slough                      | 4.5                         | 5                                 |
| Liberty Island                          | 1.8                         | 1                                 |

Examination of data for water temperature at 1m below the surface and at the bottom of the water column indicated little difference in temperature (Table 2). At most locations, differences were less than 1°C. The largest differences (>1°C) occurred in the Deepwater ship channel and Shag Slough in the early afternoon during August and September. The Deepwater ship channel is a deep navigation channel that dead ends at the Port of Sacramento and Shag Slough is near the upper end of tidal influence in the North Delta. The absence of large differences between surface and bottom temperatures, even in areas with muted tidal mixing is expected, suggests that thermal stratification is not a regular feature in the North Delta and that our models are likely adequate for estimating future water temperatures. In addition, it seems unlikely that Delta Smelt would be able to find substantial relief from warm surface temperatures by moving deeper in the water column.

1 **Table 2. Site number (Fig 1), date, start time, depth, and water body for vertical profiles of water temperature.** Site numbers  
2 16-84 refer to navigational channel markers along the Sacramento River, lower Cache Slough, and the Deepwater ship channel (see  
3 S1\_Fig 1). The values are for water temperature at 1m depth, water temperature at the bottom, and the difference between them.

4

| Site number | Date       | Start time | Water body name                | Depth (m) | Water temperature at 1 m (°C) | Water temperature at bottom (°C) | Difference (°C) |
|-------------|------------|------------|--------------------------------|-----------|-------------------------------|----------------------------------|-----------------|
| 1           | 5/14/2014  | 9:38 AM    | Liberty Island                 | 13.0      | 20.3                          | 20.3                             | 0.0             |
| 1           | 5/28/2014  | 12:32 PM   | Liberty Island                 | 1.6       | 20.5                          | 20.2                             | 0.3             |
| 1           | 5/28/2014  | 12:35 PM   | Liberty Island                 | 11.4      | 20.4                          | 20.1                             | 0.3             |
| 1           | 6/18/2014  | 13:30 PM   | Liberty Island                 | 13.7      | 21.6                          | 21.6                             | 0.0             |
| 1           | 7/8/2014   | 13:45 PM   | Liberty Island                 | 13.0      | 24.0                          | 24.1                             | 0.0             |
| 2           | 5/14/2014  | 8:52 AM    | Lindsey Slough                 | 3.8       | 20.1                          | 20.0                             | 0.1             |
| 2           | 5/28/2014  | 12:09 PM   | Lindsey Slough                 | 3.8       | 21.0                          | 20.8                             | 0.2             |
| 3           | 7/8/2014   | 13:19 PM   | Upper Cache Slough/Shag Slough | 10.2      | 23.6                          | 23.6                             | 0.0             |
| 4           | 7/8/2014   | 12:53 PM   | Shag Slough                    | 8.4       | 23.5                          | 23.5                             | 0.0             |
| 5           | 4/8/2014   | 13:10 PM   | Upper Cache Slough             | 5.4       | 18.7                          | 18.1                             | 0.6             |
| 5           | 4/24/2014  | 10:05 AM   | Upper Cache Slough             | 5.4       | 17.8                          | 17.6                             | 0.2             |
| 5           | 5/14/2014  | 9:15 AM    | Upper Cache Slough             | 4.7       | 21.2                          | 19.4                             | 1.8             |
| 5           | 6/18/2014  | 13:10 PM   | Upper Cache Slough             | 5.3       | 21.9                          | 20.6                             | 1.3             |
| 5           | 7/8/2014   | 12:20 PM   | Upper Cache Slough             | 5.6       | 23.4                          | 22.4                             | 1.0             |
| 5           | 8/26/2014  | 11:53 AM   | Upper Cache Slough             | 3.7       | 20.7                          | 20.2                             | 0.5             |
| 5           | 5/28/20104 | 11:45 AM   | Upper Cache Slough             | 4.9       | 20.5                          | 20.4                             | 0.1             |
| 6           | 8/21/2014  | 1:47 PM    | Shag Slough                    | 5.5       | 22.3                          | 21.2                             | 1.1             |
| 6           | 8/26/2014  | 12:14 PM   | Shag Slough                    | 6.0       | 21.5                          | 20.8                             | 0.7             |

|    |           |          |                             |     |      |      |     |
|----|-----------|----------|-----------------------------|-----|------|------|-----|
| 6  | 8/26/2014 | 12:36 PM | Shag Slough                 | 6.9 | 21.5 | 20.8 | 0.7 |
| 6  | 8/26/2014 | 12:55 PM | Shag Slough                 | 6.8 | 21.3 | 20.8 | 0.5 |
| 6  | 8/26/2014 | 14:33 PM | Shag Slough                 | 7.4 | 22.8 | 20.8 | 2.0 |
| 6  | 9/18/2014 | 10:02 AM | Shag Slough                 | 7.4 | 21.8 | 21.5 | 0.4 |
| 6  | 9/18/2014 | 11:23 AM | Shag Slough                 | 7.8 | 21.9 | 21.6 | 0.3 |
| 6  | 9/18/2014 | 13:28 PM | Shag Slough                 | 6.9 | 22.3 | 22.1 | 0.3 |
| 6  | 9/18/2014 | 13:39 PM | Shag Slough                 | 7.0 | 22.5 | 22.1 | 0.4 |
| 6  | 9/18/2014 | 13:55 PM | Shag Slough                 | 7.1 | 22.4 | 22.0 | 0.4 |
| 6  | 9/18/2014 | 14:11 PM | Shag Slough                 | 7.3 | 22.3 | 21.9 | 0.4 |
| 6  | 9/18/2014 | 14:27 PM | Shag Slough                 | 7.2 | 22.4 | 21.8 | 0.6 |
| 6  | 9/18/2014 | 14:41 PM | Shag Slough                 | 7.2 | 22.3 | 21.8 | 0.5 |
| 6  | 9/18/2014 | 14:57 PM | Shag Slough                 | 7.1 | 22.3 | 21.8 | 0.5 |
| 7  | 7/8/2014  | 11:35 AM | Shag Slough                 | 4.1 | 23.2 | 22.9 | 0.3 |
| 7  | 8/26/2014 | 13:15 PM | Shag Slough                 | 6.1 | 22.4 | 20.9 | 1.5 |
| 7  | 8/26/2014 | 13:35 PM | Shag Slough                 | 6.7 | 22.5 | 20.9 | 1.6 |
| 7  | 8/26/2014 | 14:18 PM | Shag Slough                 | 6.6 | 22.6 | 20.9 | 1.7 |
| 8  | 8/26/2014 | 14:00 PM | Stairstep                   | 6.2 | 21.4 | 21.3 | 0.1 |
| 9  | 6/18/2014 | 12:16 PM | Prospect Slough/Liberty Cut | 4.6 | 21.1 | 20.7 | 0.3 |
| 9  | 7/8/2014  | 9:24 AM  | Prospect Slough/Liberty Cut | 4.6 | 22.9 | 22.8 | 0.1 |
| 9  | 7/8/2014  | 9:31 AM  | Prospect Slough/Liberty Cut | 4.8 | 23.2 | 22.8 | 0.3 |
| 9  | 7/8/2014  | 9:50 AM  | Prospect Slough/Liberty Cut | 6.9 | 23.1 | 22.9 | 0.3 |
| 9  | 7/8/2014  | 10:15 AM | Prospect Slough/Liberty Cut | 6.5 | 23.0 | 23.0 | 0.0 |
| 9  | 7/8/2014  | 10:57 AM | Liberty Cut                 | 6.6 | 23.1 | 23.0 | 0.1 |
| 10 | 5/28/2014 | 13:01 PM | Toe Drain                   | 4.6 | 20.8 | 20.6 | 0.1 |
| 10 | 6/18/2014 | 12:40 PM | Toe Drain                   | 4.8 | 21.2 | 21.1 | 0.1 |
| 11 | 5/28/2014 | 9:55 AM  | Miners Slough               | 6.6 | 23.0 | 23.0 | 0.1 |
| 12 | 4/9/2014  | 14:08 PM | Miners Slough               | 6.3 | 17.7 | 17.2 | 0.5 |
| 12 | 4/24/2014 | 11:33 AM | Miners Slough               | 6.7 | 19.8 | 19.7 | 0.1 |
| 12 | 5/14/2014 | 12:44 PM | Miners Slough               | 5.7 | 21.6 | 21.6 | 0.1 |

|    |            |          |                                         |      |      |      |     |
|----|------------|----------|-----------------------------------------|------|------|------|-----|
| 12 | 6/18/2014  | 9:39 AM  | Miners Slough                           | 7.3  | 22.3 | 22.3 | 0.0 |
| 16 | 8/26/2014  | 8:34 AM  | Sacramento River, Decker Island         | 9.1  | 21.3 | 21.3 | 0.0 |
| 16 | 10/21/2014 | 8:06 AM  | Sacramento River, Decker Island         | 8.4  | 19.6 | 19.6 | 0.0 |
| 16 | 10/23/2014 | 7:51 AM  | Sacramento River, Decker Island         | 7.8  | 19.3 | 19.3 | 0.0 |
| 34 | 8/26/2014  | 9:08 AM  | Sacramento River, Rio Vista             | 9.4  | 22.1 | 22.1 | 0.0 |
| 34 | 10/21/2014 | 8:51 AM  | Sacramento River, Rio Vista             | 9.2  | 19.7 | 19.7 | 0.0 |
| 34 | 10/23/2014 | 8:14 AM  | Sacramento River, Rio Vista             | 6.4  | 19.3 | 19.3 | 0.0 |
| 44 | 4/9/2014   | 14:46 PM | Lower Cache Slough                      | 15.1 | 16.7 | 16.7 | 0.0 |
| 44 | 4/24/2014  | 13:48 PM | Lower Cache Slough                      | 15.6 | 19.5 | 19.3 | 0.2 |
| 44 | 5/14/2014  | 8:24 AM  | Lower Cache Slough                      | 15.8 | 20.2 | 20.2 | 0.0 |
| 44 | 5/28/2014  | 13:25 PM | Lower Cache Slough                      | 14.7 | 21.2 | 20.8 | 0.4 |
| 44 | 6/18/2014  | 13:52 PM | Lower Cache Slough                      | 15.1 | 21.9 | 21.8 | 0.1 |
| 44 | 7/8/2014   | 14:06 PM | Lower Cache Slough                      | 16.0 | 24.3 | 24.2 | 0.1 |
| 44 | 8/26/2014  | 9:42 AM  | Lower Cache Slough                      | 14.3 | 21.6 | 21.4 | 0.2 |
| 44 | 10/21/2014 | 9:19 AM  | Lower Cache Slough                      | 11.7 | 19.2 | 19.2 | 0.0 |
| 44 | 10/23/2014 | 8:42 AM  | Lower Cache Slough                      | 11.6 | 19.0 | 19.0 | 0.0 |
| 54 | 4/9/2014   | 13:36 PM | Sacramento River deepwater ship channel | 10.6 | 17.7 | 17.0 | 0.7 |
| 54 | 4/24/2014  | 12:15 PM | Sacramento River deepwater ship channel | 11.3 | 19.3 | 19.1 | 0.2 |
| 54 | 5/14/2014  | 12:02 PM | Sacramento River deepwater ship channel | 10.1 | 20.7 | 20.1 | 0.6 |
| 54 | 5/28/2014  | 10:13 AM | Sacramento River deepwater ship channel | 10.6 | 21.4 | 21.3 | 0.1 |
| 54 | 6/18/2014  | 11:21 AM | Sacramento River deepwater ship channel | 10.6 | 21.5 | 21.4 | 0.1 |
| 54 | 7/7/2014   | 15:11 PM | Sacramento River deepwater ship channel | 10.6 | 23.9 | 23.3 | 0.6 |
| 54 | 8/26/2014  | 10:17 AM | Sacramento River deepwater ship channel | 10.4 | 21.8 | 21.6 | 0.2 |
| 56 | 8/26/2014  | 10:39 AM | Sacramento River deepwater ship channel | 10.7 | 21.9 | 21.7 | 0.2 |
| 56 | 10/21/2014 | 9:52 AM  | Sacramento River deepwater ship channel | 10.7 | 19.6 | 19.5 | 0.1 |
| 56 | 10/23/2014 | 9:56 AM  | Sacramento River deepwater ship channel | 10.5 | 19.4 | 19.4 | 0.0 |
| 62 | 8/26/2014  | 11:06 AM | Sacramento River deepwater ship channel | 9.4  | 21.8 | 21.3 | 0.5 |
| 62 | 10/21/2014 | 10:34 AM | Sacramento River deepwater ship channel | 7.3  | 19.6 | 19.5 | 0.1 |
| 62 | 10/23/2014 | 10:18 AM | Sacramento River deepwater ship channel | 8.1  | 19.4 | 19.3 | 0.1 |

|    |            |          |                                         |      |      |      |     |
|----|------------|----------|-----------------------------------------|------|------|------|-----|
| 66 | 5/14/2014  | 11:22 AM | Sacramento River deepwater ship channel | 9.2  | 20.2 | 19.7 | 0.5 |
| 66 | 5/28/2014  | 10:51 AM | Sacramento River deepwater ship channel | 9.8  | 21.3 | 21.2 | 0.1 |
| 66 | 6/18/2014  | 10:41 AM | Sacramento River deepwater ship channel | 10.5 | 21.3 | 21.1 | 0.3 |
| 66 | 6/26/2014  | 11:03 AM | Sacramento River deepwater ship channel | 7.8  | 21.9 | 21.7 | 0.2 |
| 66 | 6/26/2014  | 11:15 AM | Sacramento River deepwater ship channel | 9.0  | 21.9 | 21.7 | 0.2 |
| 66 | 6/26/2014  | 11:30 AM | Sacramento River deepwater ship channel | 9.6  | 22.0 | 21.8 | 0.3 |
| 66 | 6/26/2014  | 11:46 AM | Sacramento River deepwater ship channel | 7.0  | 22.0 | 21.8 | 0.2 |
| 66 | 6/26/2014  | 11:49 AM | Sacramento River deepwater ship channel | 9.4  | 22.1 | 21.8 | 0.3 |
| 66 | 6/26/2014  | 12:01 PM | Sacramento River deepwater ship channel | 9.0  | 22.1 | 21.9 | 0.3 |
| 66 | 6/26/2014  | 12:17 PM | Sacramento River deepwater ship channel | 9.1  | 22.2 | 21.8 | 0.4 |
| 66 | 6/26/2014  | 12:22 PM | Sacramento River deepwater ship channel | 8.8  | 22.1 | 21.8 | 0.3 |
| 66 | 6/26/2014  | 12:34 PM | Sacramento River deepwater ship channel | 8.8  | 22.2 | 21.8 | 0.4 |
| 66 | 6/26/2014  | 12:45 PM | Sacramento River deepwater ship channel | 8.8  | 22.2 | 21.9 | 0.3 |
| 66 | 6/26/2014  | 13:02 PM | Sacramento River deepwater ship channel | 8.8  | 22.2 | 21.9 | 0.3 |
| 66 | 6/26/2014  | 13:24 PM | Sacramento River deepwater ship channel | 9.7  | 22.3 | 21.8 | 0.5 |
| 66 | 6/26/2014  | 13:45 PM | Sacramento River deepwater ship channel | 10.0 | 22.3 | 21.8 | 0.5 |
| 66 | 6/26/2014  | 14:25 PM | Sacramento River deepwater ship channel | 10.8 | 21.9 | 21.7 | 0.2 |
| 66 | 7/7/2014   | 14:20 PM | Sacramento River deepwater ship channel | 9.8  | 23.3 | 22.8 | 0.5 |
| 66 | 8/21/2014  | 10:34 AM | Sacramento River deepwater ship channel | 8.2  | 22.3 | 21.7 | 0.6 |
| 66 | 8/25/2014  | 10:11 AM | Sacramento River deepwater ship channel | 9.1  | 21.4 | 21.4 | 0.0 |
| 66 | 10/21/2014 | 11:11 AM | Sacramento River deepwater ship channel | 9.9  | 19.3 | 19.2 | 0.1 |
| 66 | 10/23/2014 | 10:42 AM | Sacramento River deepwater ship channel | 9.5  | 19.2 | 19.1 | 0.1 |
| 70 | 8/25/2014  | 10:47 AM | Sacramento River deepwater ship channel | 10.1 | 22.1 | 22.0 | 0.1 |
| 70 | 10/21/2014 | 11:48 AM | Sacramento River deepwater ship channel | 10.5 | 19.8 | 19.6 | 0.2 |
| 70 | 10/23/2014 | 11:06 AM | Sacramento River deepwater ship channel | 10.4 | 19.5 | 19.4 | 0.1 |
| 74 | 7/7/2014   | 10:57 AM | Sacramento River deepwater ship channel | 11.4 | 24.0 | 23.4 | 0.6 |
| 74 | 7/7/2014   | 11:01 AM | Sacramento River deepwater ship channel | 11.4 | 24.0 | 23.4 | 0.6 |
| 74 | 7/7/2014   | 11:17 AM | Sacramento River deepwater ship channel | 11.4 | 23.9 | 23.4 | 0.5 |
| 74 | 7/7/2014   | 11:32 AM | Sacramento River deepwater ship channel | 11.5 | 23.9 | 23.4 | 0.5 |

|    |            |          |                                         |      |      |      |     |
|----|------------|----------|-----------------------------------------|------|------|------|-----|
| 74 | 7/7/2014   | 11:50 AM | Sacramento River deepwater ship channel | 10.8 | 23.8 | 23.4 | 0.4 |
| 74 | 7/7/2014   | 12:04 PM | Sacramento River deepwater ship channel | 11.5 | 24.5 | 23.4 | 1.1 |
| 74 | 7/7/2014   | 12:17 PM | Sacramento River deepwater ship channel | 11.5 | 24.2 | 23.4 | 0.8 |
| 74 | 7/7/2014   | 12:31 PM | Sacramento River deepwater ship channel | 11.6 | 24.5 | 23.4 | 1.1 |
| 74 | 7/7/2014   | 12:45 PM | Sacramento River deepwater ship channel | 10.5 | 24.4 | 23.4 | 1.1 |
| 74 | 7/7/2014   | 13:00 PM | Sacramento River deepwater ship channel | 11.4 | 24.5 | 23.4 | 1.1 |
| 74 | 7/7/2014   | 13:17 PM | Sacramento River deepwater ship channel | 11.4 | 24.2 | 23.4 | 0.8 |
| 74 | 7/7/2014   | 13:31 PM | Sacramento River deepwater ship channel | 10.8 | 24.3 | 23.4 | 0.9 |
| 74 | 8/21/2014  | 11:36 AM | Sacramento River deepwater ship channel | 10.0 | 23.0 | 22.6 | 0.4 |
| 74 | 8/25/2014  | 11:19 AM | Sacramento River deepwater ship channel | 10.1 | 22.6 | 22.4 | 0.2 |
| 74 | 8/25/2014  | 1:25 PM  | Sacramento River deepwater ship channel | 10.2 | 23.2 | 22.4 | 0.8 |
| 74 | 10/21/2014 | 12:39 PM | Sacramento River deepwater ship channel | 11.4 | 20.0 | 19.8 | 0.2 |
| 74 | 10/23/2014 | 11:27 AM | Sacramento River deepwater ship channel | 9.7  | 19.8 | 19.6 | 0.2 |
| 76 | 8/25/2014  | 11:48 AM | Sacramento River deepwater ship channel | 10.4 | 23.5 | 23.1 | 0.4 |
| 76 | 10/21/2014 | 13:09 PM | Sacramento River deepwater ship channel | 10.9 | 20.4 | 20.0 | 0.4 |
| 76 | 10/23/2014 | 11:52 AM | Sacramento River deepwater ship channel | 11.1 | 20.3 | 19.9 | 0.4 |
| 84 | 8/21/2014  | 12:12 PM | Sacramento River deepwater ship channel | 10.8 | 24.8 | 23.8 | 1.0 |
| 84 | 8/25/2014  | 12:16 PM | Sacramento River deepwater ship channel | 9.6  | 24.2 | 23.7 | 0.5 |
| 84 | 8/25/2014  | 1:03 PM  | Sacramento River deepwater ship channel | 10.1 | 24.4 | 23.7 | 0.7 |
| 84 | 10/21/2014 | 13:42 PM | Sacramento River deepwater ship channel | 11.4 | 21.0 | 20.5 | 0.5 |
| 84 | 10/23/2014 | 12:17 PM | Sacramento River deepwater ship channel | 11.0 | 20.7 | 20.1 | 0.6 |

**Fig 1. Sites where vertical profiles of water temperature were collected, April-October 2014.**



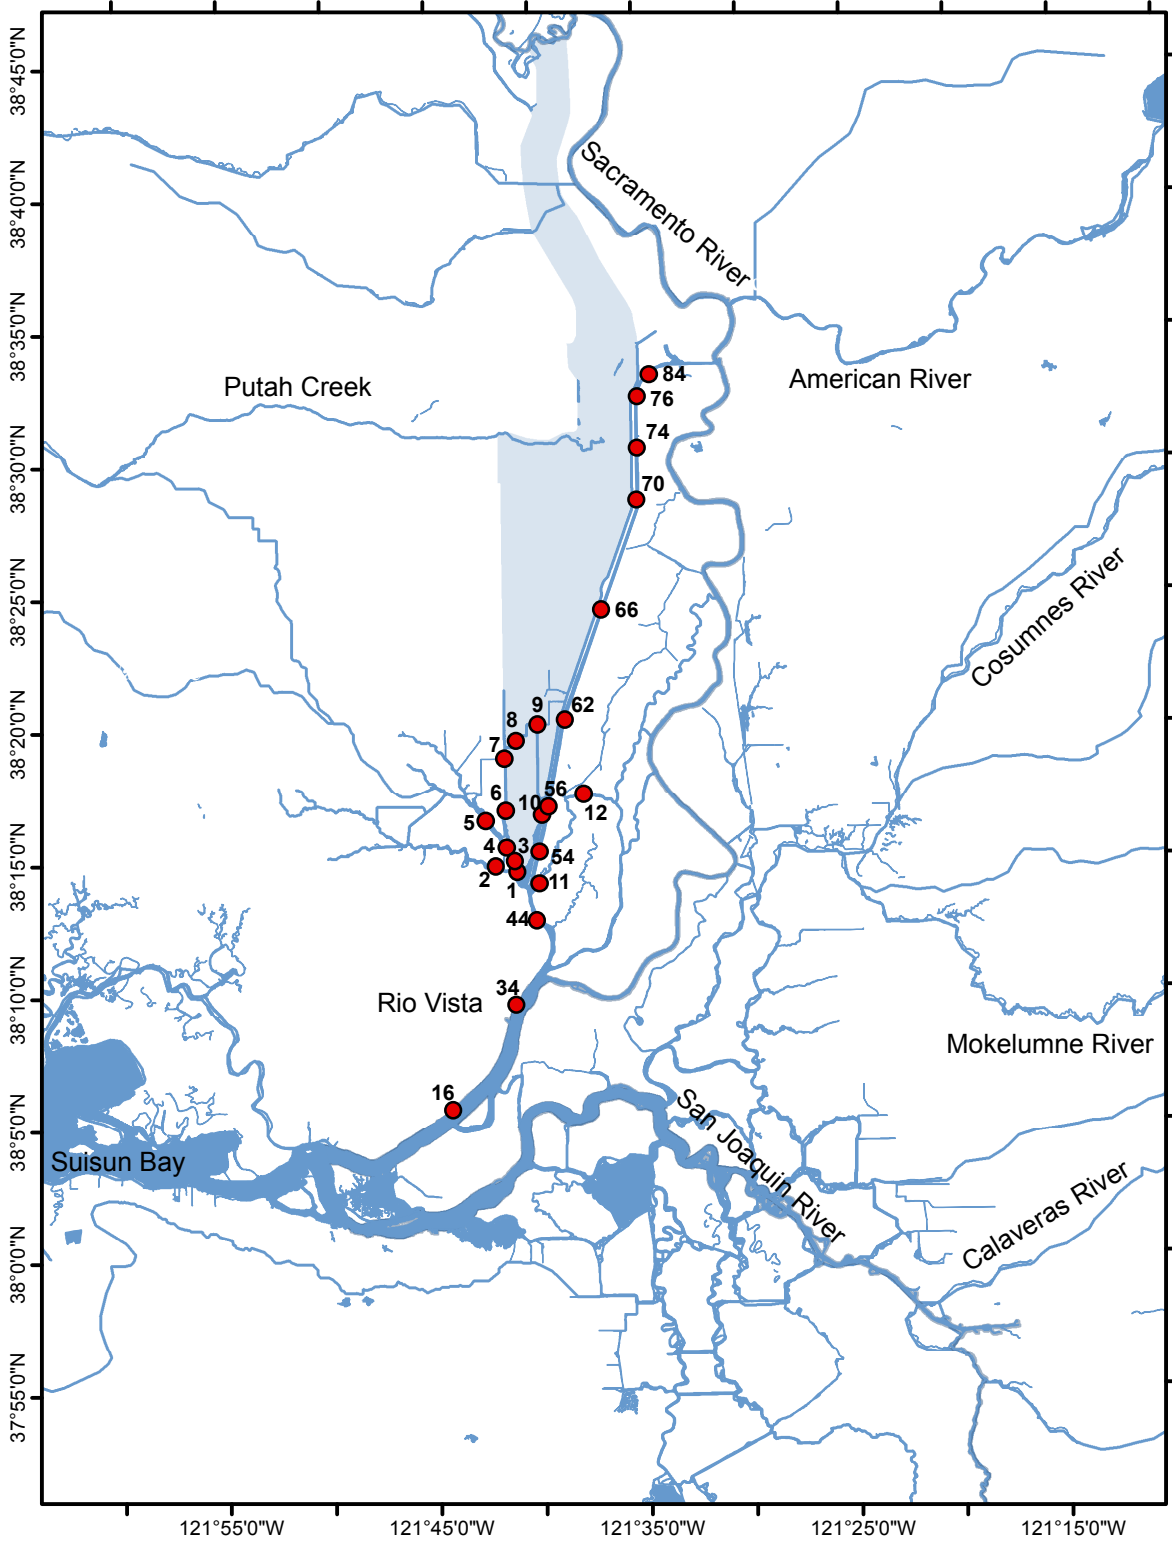

Supplement: pone.0146724.s001.pdf [file pone.0146724.s001.pdf]
