# Supplementary material for: Coupled Downscaled Climate Models and Ecophysiological Metrics Forecast Habitat Compression for an Endangered Estuarine Fish
Source: PubMed Central journal article supplement (PMC4721863; doi:10.1371/journal.pone.0146724), 2016-01-21
Supplement: pone.0146724.s006.pdf [file pone.0146724.s006.pdf]

**S1 Table. Median, minimum, and maximum values for the number of days each year when mean daily water temperature is  $\geq CLT_{max}$ , during each decade from 2010-2099, for the juvenile life stage of Delta Smelt (June-December) for the least-warming (PCM-B1), most-warming (GFDL-A2) and two intermediate (PCM-A2 and GFDL-B1) climate change scenarios.** The significance value for Trend is from the Mann-Kendal test (NS,  $P \geq 0.05$ ; \*,  $P < 0.05$ ; \*\*,  $P < 0.01$ ; \*\*\*,  $P < 0.001$ ; NA, no non-zero values; NT, fewer than 3 values so trend not calculated) and the number is the slope of a regression of decadal medians.

|                          | 2010-2019 |          |          | 2020-2029 |          |          | 2030-2039 |          |          | 2040-2049 |          |          | 2050-2059 |          |          | 2060-2069 |          |          | 2070-2079 |          |          | 2080-2089 |          |          | 2090-2099 |          |          | Trend    |
|--------------------------|-----------|----------|----------|-----------|----------|----------|-----------|----------|----------|-----------|----------|----------|-----------|----------|----------|-----------|----------|----------|-----------|----------|----------|-----------|----------|----------|-----------|----------|----------|----------|
|                          | Median    | Mini-mum | Maxi-mum | Median    | Mini-mum | Maxi-mum | Median    | Mini-mum | Maxi-mum | Median    | Mini-mum | Maxi-mum | Median    | Mini-mum | Maxi-mum | Median    | Mini-mum | Maxi-mum | Median    | Mini-mum | Maxi-mum | Median    | Mini-mum | Maxi-mum | Median    | Mini-mum | Maxi-mum |          |
| <b>Scenario GFDL-A2</b>  |           |          |          |           |          |          |           |          |          |           |          |          |           |          |          |           |          |          |           |          |          |           |          |          |           |          |          |          |
| <b>San Joaquin River</b> |           |          |          |           |          |          |           |          |          |           |          |          |           |          |          |           |          |          |           |          |          |           |          |          |           |          |          |          |
| Mossdale                 | 28        | 11       | 47       | 41.5      | 19       | 79       | 41.5      | 26       | 71       | 45.5      | 25       | 69       | 59        | 39       | 86       | 71        | 56       | 111      | 82.5      | 62       | 110      | 102       | 72       | 128      | 117       | 94       | 130      | 10.75*** |
| Burns Cut                | 59.5      | 24       | 89       | 61.5      | 58       | 100      | 71        | 46       | 89       | 67.5      | 51       | 111      | 94.5      | 62       | 120      | 99.5      | 77       | 120      | 102.5     | 94       | 135      | 125       | 94       | 133      | 128       | 105      | 140      | 9.33***  |
| Prisoners Point          | 0         | 0        | 7        | 0         | 0        | 7        | 4.5       | 0        | 12       | 7.5       | 0        | 14       | 4         | 0        | 20       | 13        | 7        | 44       | 22.5      | 6        | 60       | 31        | 11       | 80       | 56.5      | 36       | 73       | 6***     |
| Jersey Point             | 0         | 0        | 5        | 0         | 0        | 16       | 0         | 0        | 12       | 12        | 0        | 19       | 11        | 0        | 37       | 21        | 0        | 55       | 29        | 9        | 72       | 54.5      | 25       | 83       | 91.5      | 73       | 109      | 9.94***  |
| Antioch                  | 0         | 0        | 11       | 0         | 0        | 21       | 7.5       | 0        | 14       | 17.5      | 0        | 22       | 11.5      | 0        | 45       | 24        | 15       | 54       | 33.5      | 12       | 80       | 56        | 25       | 101      | 89        | 68       | 111      | 9.71***  |
| <b>Sacramento River</b>  |           |          |          |           |          |          |           |          |          |           |          |          |           |          |          |           |          |          |           |          |          |           |          |          |           |          |          |          |
| Hood                     | 0         | 0        | 0        | 0         | 0        | 0        | 0         | 0        | 5        | 0         | 0        | 10       | 0         | 0        | 13       | 6.5       | 0        | 42       | 19        | 0        | 62       | 24.5      | 3        | 84       | 52.5      | 45       | 74       | 5.47**   |
| Rio Vista                | 0         | 0        | 3        | 0         | 0        | 3        | 0         | 0        | 7        | 4         | 0        | 12       | 2         | 0        | 18       | 14.5      | 6        | 50       | 26        | 4        | 69       | 34        | 12       | 93       | 68        | 53       | 95       | 7.28***  |
| Decker Island            | 0         | 0        | 0        | 0         | 0        | 0        | 0         | 0        | 5        | 0         | 0        | 9        | 2         | 0        | 13       | 4         | 0        | 43       | 13        | 0        | 68       | 34        | 2        | 74       | 73        | 54       | 101      | 7.07***  |
| <b>North Delta</b>       |           |          |          |           |          |          |           |          |          |           |          |          |           |          |          |           |          |          |           |          |          |           |          |          |           |          |          |          |
| Upper Cache Slough       | 0         | 0        | 0        | 0         | 0        | 0        | 0         | 0        | 0        | 0         | 0        | 0        | 0         | 0        | 2        | 0         | 0        | 2        | 2         | 0        | 16       | 5.5       | 0        | 38       | 26.5      | 2        | 35       | 2.11**   |
| Miners Slough            | 0         | 0        | 0        | 0         | 0        | 0        | 0         | 0        | 0        | 0         | 0        | 0        | 0         | 0        | 2        | 0         | 0        | 4        | 2         | 0        | 20       | 6.5       | 0        | 41       | 31        | 14       | 37       | 2.46**   |
| Liberty Island           | 0.5       | 0        | 10       | 0         | 0        | 12       | 5         | 0        | 15       | 12.5      | 0        | 18       | 16        | 1        | 32       | 19        | 1        | 51       | 27        | 12       | 73       | 42.5      | 16       | 79       | 72.5      | 55       | 100      | 9.51***  |
| Deepwater Ship Channel   | 0         | 0        | 3        | 0         | 0        | 2        | 0         | 0        | 5        | 1         | 0        | 10       | 0         | 0        | 14       | 7         | 0        | 40       | 15        | 0        | 53       | 24        | 4        | 57       | 50.5      | 40       | 73       | 5.17**   |
| Lower Cache Slough       | 0         | 0        | 0        | 0         | 0        | 0        | 0         | 0        | 0        | 0         | 0        | 0        | 0         | 0        | 3        | 0         | 0        | 9        | 3         | 0        | 26       | 12        | 0        | 43       | 34        | 18       | 43       | 2.97**   |
| <b>Confluence</b>        |           |          |          |           |          |          |           |          |          |           |          |          |           |          |          |           |          |          |           |          |          |           |          |          |           |          |          |          |
| Mallard Island           | 0         | 0        | 0        | 0         | 0        | 0        | 0         | 0        | 1        | 0         | 0        | 2        | 0         | 0        | 8        | 0         | 0        | 22       | 9.5       | 0        | 44       | 14.5      | 0        | 56       | 39        | 25       | 56       | 3.64***  |
| <b>Suisun Bay</b>        |           |          |          |           |          |          |           |          |          |           |          |          |           |          |          |           |          |          |           |          |          |           |          |          |           |          |          |          |
| Martinez                 | 0         | 0        | 0        | 0         | 0        | 0        | 0         | 0        | 0        | 0         | 0        | 0        | 0         | 0        | 0        | 0         | 0        | 0        | 2.5       | 0        | 16       | 6.5       | 0        | 41       | 22.5      | 1        | 33       | 1.91**   |
| <b>Scenario GFDL-B1</b>  |           |          |          |           |          |          |           |          |          |           |          |          |           |          |          |           |          |          |           |          |          |           |          |          |           |          |          |          |
| <b>San Joaquin River</b> |           |          |          |           |          |          |           |          |          |           |          |          |           |          |          |           |          |          |           |          |          |           |          |          |           |          |          |          |
| Mossdale                 | 31        | 13       | 65       | 28        | 5        | 41       | 43.5      | 4        | 80       | 42        | 30       | 76       | 50        | 18       | 77       | 51        | 22       | 75       | 61        | 43       | 111      | 48.5      | 26       | 81       | 71        | 51       | 94       | 4.43**   |
| Burns Cut                | 55        | 37       | 79       | 59        | 42       | 74       | 68        | 30       | 88       | 69.5      | 56       | 101      | 72.5      | 40       | 92       | 82.5      | 57       | 103      | 97.5      | 64       | 115      | 81.5      | 69       | 107      | 92        | 58       | 109      | 4.79**   |
| Prisoners Point          | 0         | 0        | 9        | 0         | 0        | 6        | 1.5       | 0        | 23       | 1         | 0        | 12       | 3         | 0        | 15       | 4.5       | 0        | 31       | 2.5       | 0        | 44       | 2         | 0        | 16       | 10        | 0        | 36       | 0.86*    |
| Jersey Point             | 0         | 0        | 12       | 0         | 0        | 4        | 0         | 0        | 37       | 0         | 0        | 18       | 0         | 0        | 16       | 7.5       | 0        | 46       | 0         | 0        | 14       | 2         | 0        | 77       | 15        | 0        | 57       | NS       |
| Antioch                  | 0         | 0        | 11       | 0         | 0        | 17       | 3         | 0        | 40       | 1.5       | 0        | 32       | 5.5       | 0        | 19       | 6.5       | 0        | 50       | 5.5       | 0        | 80       | 7         | 0        | 21       | 19        | 0        | 56       | 1.79**   |
| <b>Sacramento River</b>  |           |          |          |           |          |          |           |          |          |           |          |          |           |          |          |           |          |          |           |          |          |           |          |          |           |          |          |          |
| Hood                     | 0         | 0        | 0        | 0         | 0        | 0        | 0         | 0        | 14       | 0         | 0        | 10       | 0         | 0        | 11       | 0         | 0        | 30       | 0         | 0        | 31       | 0         | 0        | 10       | 0         | 0        | 27       | NA       |
| Rio Vista                | 0         | 0        | 3        | 0         | 0        | 4        | 0         | 0        | 24       | 0         | 0        | 13       | 0         | 0        | 15       | 1         | 0        | 33       | 0         | 0        | 48       | 0         | 0        | 12       | 12        | 0        | 37       | NS       |
| Decker Island            | 0         | 0        | 0        | 0         | 0        | 0        | 0         | 0        | 20       | 0         | 0        | 10       | 0         | 0        | 6        | 0         | 0        | 29       | 0         | 0        | 0        | 0         | 0        | 51       | 0         | 0        | 36       | NA       |
| <b>North Delta</b>       |           |          |          |           |          |          |           |          |          |           |          |          |           |          |          |           |          |          |           |          |          |           |          |          |           |          |          |          |
| Upper Cache Slough       | 0         | 0        | 0        | 0         | 0        | 0        | 0         | 0        | 3        | 0         | 0        | 3        | 0         | 0        | 7        | 0         | 0        | 0        | 0         | 0        | 0        | 0         | 0        | 5        | 0         | 0        | 7        | NA       |
| Miners Slough            | 0         | 0        | 0        | 0         | 0        | 0        | 0         | 0        | 3        | 0         | 0        | 3        | 0         | 0        | 5        | 0         | 0        | 0        | 0         | 0        | 0        | 0         | 0        | 4        | 0         | 0        | 9        | NA       |
| Liberty Island           | 0         | 0        | 14       | 0         | 0        | 10       | 4.5       | 0        | 27       | 3         | 0        | 23       | 3         | 0        | 17       | 11        | 0        | 34       | 3.5       | 0        | 17       | 7         | 0        | 67       | 16        | 0        | 45       | 2.04**   |
| Deepwater Ship Channel   | 0         | 0        | 7        | 0         | 0        | 4        | 0         | 0        | 17       | 0         | 0        | 12       | 0         | 0        | 13       | 0         | 0        | 25       | 0         | 0        | 0        | 0         | 0        | 19       | 5         | 0        | 24       | NT       |
| Lower Cache Slough       | 0         | 0        | 0        | 0         | 0        | 0        | 0         | 0        | 5        | 0         | 0        | 5        | 0         | 0        | 8        | 0         | 0        | 2        | 0         | 0        | 0        | 0         | 0        | 6        | 0         | 0        | 13       | NA       |
| <b>Confluence</b>        |           |          |          |           |          |          |           |          |          |           |          |          |           |          |          |           |          |          |           |          |          |           |          |          |           |          |          |          |
| Mallard Island           | 0         | 0        | 0        | 0         | 0        | 0        | 0         | 0        | 9        | 0         | 0        | 8        | 0         | 0        | 9        | 0         | 0        | 9        | 0         | 0        | 10       | 0         | 0        | 6        | 0         | 0        | 17       | NA       |
| <b>Suisun Bay</b>        |           |          |          |           |          |          |           |          |          |           |          |          |           |          |          |           |          |          |           |          |          |           |          |          |           |          |          |          |
| Martinez                 | 0         | 0        | 0        | 0         | 0        | 0        | 0         | 0        | 2        | 0         | 0        | 3        | 0         | 0        | 5        | 0         | 0        | 0        | 0         | 0        | 1        | 0         | 0        | 0        | 0         | 0        | 7        | NA       |
| <b>Scenario PCM-A2</b>   |           |          |          |           |          |          |           |          |          |           |          |          |           |          |          |           |          |          |           |          |          |           |          |          |           |          |          |          |
| <b>San Joaquin River</b> |           |          |          |           |          |          |           |          |          |           |          |          |           |          |          |           |          |          |           |          |          |           |          |          |           |          |          |          |
