# Supplementary material for: Coupled Downscaled Climate Models and Ecophysiological Metrics Forecast Habitat Compression for an Endangered Estuarine Fish
Source: PubMed Central journal article supplement (PMC4721863; doi:10.1371/journal.pone.0146724), 2016-01-21
Supplement: pone.0146724.s007.pdf [file pone.0146724.s007.pdf]

**S2 Table. Median, minimum, and maximum values for the number of days per year when mean daily water temperature is  $\geq 24^{\circ}\text{C}$ , during each decade from 2010-2099, for the juvenile life stage of Delta Smelt (June-December) for the least-warming (PCM-B1), most-warming (GFDL-A2) and two intermediate (PCM-A2 and GFDL-B1) climate change scenarios.** The significance value for Trend is from the Mann-Kendal test (NS,  $P \geq 0.05$ ; \*,  $P < 0.05$ ; \*\*,  $P < 0.01$ ; \*\*\*,  $P < 0.001$ ; NA, no non-zero values; NT, fewer than 3 values so trend not calculated) and the number is the slope of a regression of decadal medians.

|                          | 2010-2019 |          |          | 2020-2029 |          |          | 2030-2039 |          |          | 2040-2049 |          |          | 2050-2059 |          |          | 2060-2069 |          |          | 2070-2079 |          |          | 2080-2089 |          |          | 2090-2099 |          |          | Trend    |
|--------------------------|-----------|----------|----------|-----------|----------|----------|-----------|----------|----------|-----------|----------|----------|-----------|----------|----------|-----------|----------|----------|-----------|----------|----------|-----------|----------|----------|-----------|----------|----------|----------|
|                          | Median    | Mini-mum | Maxi-mum | Median    | Mini-mum | Maxi-mum | Median    | Mini-mum | Maxi-mum | Median    | Mini-mum | Maxi-mum | Median    | Mini-mum | Maxi-mum | Median    | Mini-mum | Maxi-mum | Median    | Mini-mum | Maxi-mum | Median    | Mini-mum | Maxi-mum | Median    | Mini-mum | Maxi-mum |          |
| <b>Scenario GFDL-A2</b>  |           |          |          |           |          |          |           |          |          |           |          |          |           |          |          |           |          |          |           |          |          |           |          |          |           |          |          |          |
| <b>San Joaquin River</b> |           |          |          |           |          |          |           |          |          |           |          |          |           |          |          |           |          |          |           |          |          |           |          |          |           |          |          |          |
| Mossdale                 | 93        | 70       | 118      | 93.5      | 77       | 121      | 107       | 72       | 118      | 103.5     | 87       | 129      | 120       | 96       | 124      | 122.5     | 110      | 135      | 126       | 108      | 137      | 130.5     | 117      | 142      | 136.5     | 133      | 151      | 5.7***   |
| Burns Cut                | 112       | 104      | 130      | 119       | 87       | 130      | 120       | 78       | 124      | 118       | 102      | 138      | 130       | 117      | 134      | 133.5     | 116      | 143      | 132.5     | 115      | 148      | 139.5     | 128      | 145      | 144.5     | 137      | 152      | 3.87**   |
| Prisoners Point          | 66.5      | 35       | 98       | 68        | 63       | 104      | 82.5      | 57       | 93       | 75        | 62       | 117      | 101.5     | 67       | 121      | 102.5     | 87       | 122      | 105       | 97       | 136      | 129.5     | 102      | 136      | 130       | 111      | 145      | 9.38***  |
| Jersey Point             | 69.5      | 23       | 104      | 70.5      | 57       | 113      | 79.5      | 60       | 98       | 81        | 67       | 119      | 109       | 72       | 124      | 109.5     | 100      | 126      | 114.5     | 102      | 129      | 134.5     | 103      | 144      | 137.5     | 125      | 152      | 9.38***  |
| Antioch                  | 57        | 21       | 93       | 63.5      | 55       | 100      | 74.5      | 49       | 88       | 68.5      | 56       | 115      | 100       | 58       | 122      | 0.5       | 90       | 122      | 107       | 98       | 137      | 28.5      | 97       | 137      | 133       | 117      | 151      | 9.93***  |
| <b>Sacramento River</b>  |           |          |          |           |          |          |           |          |          |           |          |          |           |          |          |           |          |          |           |          |          |           |          |          |           |          |          |          |
| Hood                     | 26.5      | 2        | 56       | 43        | 18       | 86       | 45.5      | 27       | 76       | 48        | 32       | 78       | 66.5      | 41       | 98       | 75        | 57       | 110      | 95        | 70       | 121      | 108       | 74       | 132      | 123.5     | 94       | 137      | 11.82*** |
| Rio Vista                | 40.5      | 18       | 62       | 48.5      | 33       | 90       | 55.5      | 38       | 82       | 56.5      | 44       | 92       | 84.5      | 51       | 114      | 90        | 72       | 117      | 101       | 88       | 130      | 117       | 93       | 136      | 128       | 103      | 147      | 11.33*** |
| Decker Island            | 42        | 5        | 67       | 46.5      | 18       | 94       | 64        | 39       | 83       | 63        | 44       | 95       | 89.5      | 48       | 111      | 89        | 82       | 112      | 102.5     | 91       | 112      | 119.5     | 99       | 129      | 133.5     | 114      | 146      | 11.47*** |
| <b>North Delta</b>       |           |          |          |           |          |          |           |          |          |           |          |          |           |          |          |           |          |          |           |          |          |           |          |          |           |          |          |          |
| Upper Cache Slough       | 9         | 0        | 22       | 8.5       | 0        | 62       | 17.5      | 0        | 43       | 26.5      | 3        | 46       | 32        | 13       | 77       | 39        | 30       | 74       | 60.5      | 44       | 91       | 74.5      | 57       | 110      | 116.5     | 86       | 127      | 12.11*** |
| Miners Slough            | 13.5      | 0        | 28       | 17        | 0        | 66       | 24        | 3        | 57       | 29.5      | 9        | 50       | 40        | 23       | 80       | 44.5      | 32       | 87       | 67.5      | 52       | 94       | 86        | 59       | 113      | 118       | 87       | 127      | 12.12*** |
| Liberty Island           | 36        | 8        | 61       | 42.5      | 25       | 88       | 54        | 37       | 78       | 54        | 43       | 93       | 87        | 49       | 113      | 85        | 69       | 117      | 100       | 80       | 120      | 116.5     | 94       | 131      | 132       | 107      | 148      | 12.04*** |
| Deepwater Ship Channel   | 18.5      | 0        | 50       | 27        | 4        | 76       | 33        | 19       | 70       | 37.5      | 16       | 61       | 50.5      | 30       | 86       | 55        | 52       | 102      | 82.5      | 58       | 110      | 98.5      | 65       | 118      | 123.5     | 91       | 132      | 12.52*** |
| Lower Cache Slough       | 15.5      | 0        | 38       | 21.5      | 1        | 73       | 27.5      | 12       | 64       | 32        | 11       | 56       | 44.5      | 29       | 84       | 49.5      | 37       | 93       | 77        | 57       | 106      | 94.5      | 60       | 115      | 122.5     | 88       | 133      | 12.73*** |
| <b>Confluence</b>        |           |          |          |           |          |          |           |          |          |           |          |          |           |          |          |           |          |          |           |          |          |           |          |          |           |          |          |          |
| Mallard Island           | 17.5      | 0        | 48       | 35        | 9        | 82       | 29.5      | 16       | 71       | 39        | 13       | 66       | 51        | 30       | 84       | 63        | 43       | 96       | 86        | 62       | 119      | 100       | 61       | 133      | 121.5     | 90       | 135      | 12.47*** |
| <b>Suisun Bay</b>        |           |          |          |           |          |          |           |          |          |           |          |          |           |          |          |           |          |          |           |          |          |           |          |          |           |          |          |          |
| Martinez                 | 0         | 0        | 13       | 0         | 0        | 40       | 10        | 0        | 23       | 21.5      | 0        | 36       | 15        | 0        | 64       | 35        | 22       | 61       | 45        | 21       | 83       | 68        | 43       | 104      | 102.5     | 77       | 116      | 11.63*** |
| <b>Scenario GFDL-B1</b>  |           |          |          |           |          |          |           |          |          |           |          |          |           |          |          |           |          |          |           |          |          |           |          |          |           |          |          |          |
| <b>San Joaquin River</b> |           |          |          |           |          |          |           |          |          |           |          |          |           |          |          |           |          |          |           |          |          |           |          |          |           |          |          |          |
| Mossdale                 | 84.5      | 77       | 118      | 95        | 84       | 112      | 99        | 75       | 112      | 104.5     | 84       | 119      | 101       | 76       | 123      | 111       | 87       | 139      | 111.5     | 88       | 120      | 116       | 97       | 132      | 109       | 84       | 122      | 3.21**   |
| Burns Cut                | 107       | 92       | 134      | 112.5     | 94       | 122      | 111       | 87       | 127      | 114.5     | 108      | 131      | 112.5     | 88       | 132      | 125       | 110      | 146      | 123       | 106      | 130      | 128       | 111      | 139      | 127.5     | 101      | 139      | 2.72**   |
| Prisoners Point          | 61        | 39       | 86       | 69.5      | 52       | 84       | 74        | 48       | 90       | 79        | 59       | 101      | 73.5      | 49       | 100      | 92.5      | 62       | 109      | 94.5      | 73       | 114      | 102       | 82       | 116      | 94        | 60       | 110      | 4.73**   |
| Jersey Point             | 64.5      | 40       | 100      | 72.5      | 58       | 97       | 73.5      | 26       | 100      | 80.5      | 53       | 102      | 79.5      | 54       | 103      | 93.5      | 62       | 116      | 98.5      | 59       | 115      | 112       | 83       | 123      | 91.5      | 65       | 109      | 4.83**   |
| Antioch                  | 57        | 37       | 86       | 56        | 40       | 69       | 67.5      | 18       | 92       | 72        | 49       | 98       | 69.5      | 46       | 99       | 84        | 52       | 106      | 89        | 55       | 114      | 100       | 73       | 118      | 91.5      | 58       | 112      | 5.42**   |
| <b>Sacramento River</b>  |           |          |          |           |          |          |           |          |          |           |          |          |           |          |          |           |          |          |           |          |          |           |          |          |           |          |          |          |
| Hood                     | 29.5      | 12       | 65       | 25.5      | 0        | 41       | 47        | 3        | 81       | 45.5      | 33       | 89       | 46        | 13       | 83       | 56        | 18       | 79       | 61        | 27       | 92       | 63        | 30       | 104      | 66        | 54       | 91       | 4.95**   |
| Rio Vista                | 38        | 21       | 75       | 39        | 4        | 50       | 56.5      | 8        | 85       | 57        | 44       | 94       | 59        | 33       | 90       | 70.5      | 36       | 87       | 70        | 39       | 107      | 79        | 48       | 114      | 79.5      | 56       | 101      | 5.44***  |
| Decker Island            | 36        | 13       | 54       | 45        | 23       | 87       | 57        | 0        | 92       | 60.5      | 44       | 93       | 55.5      | 29       | 95       | 72.5      | 22       | 100      | 81        | 39       | 109      | 96        | 55       | 110      | 80        | 55       | 95       | 6.48**   |
| <b>North Delta</b>       |           |          |          |           |          |          |           |          |          |           |          |          |           |          |          |           |          |          |           |          |          |           |          |          |           |          |          |          |
| Upper Cache Slough       | 6         | 1        | 24       | 8.5       | 0        | 45       | 20        | 0        | 62       | 17        | 13       | 55       | 20        | 0        | 43       | 33        | 0        | 58       | 32.5      | 8        | 49       | 29        | 11       | 100      | 31.5      | 0        | 76       | 3.41*    |
| Miners Slough            | 8.5       | 2        | 25       | 12        | 0        | 51       | 25        | 0        | 65       | 22        | 14       | 62       | 22        | 0        | 57       | 39.5      | 0        | 63       | 42        | 12       | 55       | 36.5      | 14       | 100      | 35.5      | 0        | 79       | 3.88*    |
| Liberty Island           | 32        | 13       | 51       | 41        | 18       | 77       | 51.5      | 2        | 85       | 53.5      | 43       | 95       | 51.5      | 30       | 96       | 65.5      | 26       | 86       | 71        | 37       | 101      | 82.5      | 47       | 114      | 75        | 51       | 95       | 5.49***  |
| Deepwater Ship Channel   | 18.5      | 6        | 33       | 21        | 0        | 62       | 35        | 0        | 78       | 34        | 24       | 80       | 30.5      | 8        | 76       | 46.5      | 8        | 74       | 49.5      | 19       | 70       | 54.5      | 24       | 102      | 50        | 8        | 88       | 4.47**   |
| Lower Cache Slough       | 11        | 5        | 28       | 12.5      | 0        | 54       | 30.5      | 0        | 72       | 27        | 19       | 75       | 23.5      | 3        | 70       | 42.5      | 0        | 67       | 46        | 15       | 63       | 45        | 19       | 102      | 42.5      | 2        | 81       | 4.5*     |
| <b>Confluence</b>        |           |          |          |           |          |          |           |          |          |           |          |          |           |          |          |           |          |          |           |          |          |           |          |          |           |          |          |          |
| Mallard Island           | 17        | 6        | 59       | 14.5      | 0        | 40       | 38        | 0        | 75       | 29.5      | 24       | 82       | 31.5      | 5        | 77       | 49        | 1        | 74       | 48.5      | 20       | 79       | 46.5      | 7        | 103      | 49.5      | 41       | 85       | 4.44**   |
| <b>Suisun Bay</b>        |           |          |          |           |          |          |           |          |          |           |          |          |           |          |          |           |          |          |           |          |          |           |          |          |           |          |          |          |
| Martinez                 | 0         | 0        | 21       | 0         | 0        | 30       | 8         | 0        | 52       | 7.5       | 0        | 44       | 2         | 0        | 20       | 24        | 0        | 56       | 8         | 0        | 40       | 10        | 0        | 93       | 25        | 3        | 67       | 2.44**   |
| <b>Scenario PCM-A2</b>   |           |          |          |           |          |          |           |          |          |           |          |          |           |          |          |           |          |          |           |          |          |           |          |          |           |          |          |          |
| <b>San Joaquin River</b> |           |          |          |           |          |          |           |          |          |           |          |          |           |          |          |           |          |          |           |          |          |           |          |          |           |          |          |          |
| Mossdale                 | 87.5      | 68       | 107      | 92.5      | 85       | 100      | 94.5      | 83       | 116      | 108       | 82       | 126      | 108.5     | 80       | 124      | 112.5     | 86       | 122      | 111       | 94       | 130      | 117       | 113      | 136      | 134       | 109      | 150      | 4.95***  |

|                          |       |    |     |      |    |     |      |     |     |       |    |     |       |     |     |       |     |     |       |     |     |       |     |     |       |     |     |         |
|--------------------------|-------|----|-----|------|----|-----|------|-----|-----|-------|----|-----|-------|-----|-----|-------|-----|-----|-------|-----|-----|-------|-----|-----|-------|-----|-----|---------|
| Burns Cut                | 104.5 | 91 | 122 | 104  | 91 | 124 | 112  | 100 | 139 | 117.5 | 94 | 147 | 124.5 | 107 | 137 | 124.5 | 104 | 136 | 121.5 | 112 | 143 | 131   | 121 | 149 | 138.5 | 115 | 154 | 4.05**  |
| Prisoners Point          | 58    | 28 | 79  | 74   | 49 | 82  | 63.5 | 44  | 92  | 84.5  | 53 | 94  | 81.5  | 63  | 113 | 83.5  | 65  | 105 | 96.5  | 76  | 120 | 104   | 94  | 118 | 108.5 | 96  | 138 | 5.95**  |
| Jersey Point             | 56    | 25 | 86  | 68.5 | 50 | 81  | 65.5 | 35  | 92  | 88.5  | 65 | 103 | 79.5  | 55  | 118 | 86.5  | 75  | 109 | 97.5  | 66  | 124 | 107.5 | 94  | 116 | 120   | 98  | 140 | 7.25**  |
| Antioch                  | 46.5  | 16 | 70  | 66   | 40 | 75  | 56.5 | 30  | 91  | 80.5  | 52 | 91  | 73.5  | 51  | 115 | 76    | 57  | 100 | 93.5  | 64  | 117 | 103   | 88  | 118 | 111   | 97  | 138 | 7.31**  |
| <b>Sacramento River</b>  |       |    |     |      |    |     |      |     |     |       |    |     |       |     |     |       |     |     |       |     |     |       |     |     |       |     |     |         |
| Hood                     | 11    | 0  | 40  | 27.5 | 14 | 44  | 39.5 | 13  | 49  | 43    | 28 | 71  | 52    | 26  | 85  | 50    | 11  | 76  | 67    | 49  | 107 | 75    | 63  | 96  | 84.5  | 65  | 130 | 8.31*** |
| Rio Vista                | 21.5  | 5  | 63  | 45   | 28 | 63  | 48.5 | 20  | 70  | 64.5  | 48 | 78  | 64.5  | 36  | 104 | 69    | 39  | 89  | 81    | 59  | 112 | 87    | 68  | 113 | 96.5  | 81  | 135 | 8.26*** |
| Decker Island            | 15    | 0  | 65  | 45.5 | 30 | 61  | 47   | 19  | 69  | 69.5  | 42 | 78  | 64.5  | 36  | 107 | 71    | 58  | 93  | 84.5  | 61  | 116 | 94    | 75  | 100 | 103.5 | 93  | 136 | 9.6***  |
| <b>North Delta</b>       |       |    |     |      |    |     |      |     |     |       |    |     |       |     |     |       |     |     |       |     |     |       |     |     |       |     |     |         |
| Upper Cache Slough       | 0     | 0  | 16  | 6    | 0  | 19  | 6    | 0   | 17  | 16    | 1  | 32  | 20.5  | 0   | 49  | 27    | 1   | 65  | 39    | 29  | 73  | 42.5  | 34  | 62  | 58    | 41  | 93  | 6.98*** |
| Miners Slough            | 0.5   | 0  | 21  | 10   | 0  | 25  | 14.5 | 0   | 20  | 22    | 8  | 37  | 29.5  | 0   | 48  | 35    | 1   | 69  | 46.5  | 33  | 76  | 53    | 41  | 67  | 67    | 56  | 102 | 7.87*** |
| Liberty Island           | 17.5  | 4  | 58  | 39   | 26 | 58  | 47   | 17  | 61  | 61    | 38 | 77  | 59.5  | 33  | 106 | 66.5  | 43  | 87  | 83.5  | 60  | 115 | 90    | 75  | 101 | 101   | 87  | 136 | 9.42*** |
| Deepwater Ship Channel   | 6     | 0  | 29  | 20.5 | 6  | 29  | 28.5 | 11  | 38  | 36.5  | 18 | 49  | 41    | 3   | 70  | 42.5  | 33  | 73  | 60    | 40  | 90  | 60.5  | 54  | 77  | 87.5  | 69  | 120 | 8.58*** |
| Lower Cache Slough       | 1.5   | 0  | 21  | 15   | 0  | 26  | 20.5 | 3   | 29  | 26.5  | 9  | 39  | 34    | 1   | 67  | 38.5  | 14  | 71  | 55    | 40  | 84  | 55.5  | 47  | 72  | 80    | 64  | 117 | 8.61*** |
| <b>Confluence</b>        |       |    |     |      |    |     |      |     |     |       |    |     |       |     |     |       |     |     |       |     |     |       |     |     |       |     |     |         |
| Mallard Island           | 2     | 0  | 26  | 17   | 4  | 27  | 27.5 | 1   | 37  | 32    | 15 | 41  | 42    | 18  | 72  | 39    | 0   | 72  | 57    | 42  | 92  | 61    | 57  | 88  | 79.5  | 59  | 128 | 8.47*** |
| <b>Suisun Bay</b>        |       |    |     |      |    |     |      |     |     |       |    |     |       |     |     |       |     |     |       |     |     |       |     |     |       |     |     |         |
| Martinez                 | 0     | 0  | 6   | 0    | 0  | 7   | 0    | 0   | 0   | 2.5   | 0  | 17  | 10    | 0   | 25  | 3     | 0   | 45  | 22.5  | 0   | 52  | 36    | 23  | 49  | 44.5  | 15  | 74  | 5.53*** |
| <b>Scenario PCM-B1</b>   |       |    |     |      |    |     |      |     |     |       |    |     |       |     |     |       |     |     |       |     |     |       |     |     |       |     |     |         |
| <b>San Joaquin River</b> |       |    |     |      |    |     |      |     |     |       |    |     |       |     |     |       |     |     |       |     |     |       |     |     |       |     |     |         |
| Mossdale                 | 81.5  | 50 | 103 | 82   | 64 | 93  | 86.5 | 68  | 106 | 78.5  | 61 | 97  | 87.5  | 69  | 123 | 90.5  | 70  | 104 | 90.5  | 74  | 121 | 109.5 | 61  | 119 | 90.5  | 86  | 111 | 2.31**  |
| Burns Cut                | 93    | 87 | 112 | 100  | 85 | 112 | 104  | 80  | 116 | 96.5  | 85 | 120 | 108.5 | 92  | 132 | 110.5 | 85  | 125 | 108   | 96  | 141 | 118   | 80  | 129 | 112   | 95  | 135 | 2.53**  |
| Prisoners Point          | 36.5  | 8  | 69  | 44.5 | 20 | 69  | 51   | 34  | 86  | 47.5  | 32 | 80  | 59.5  | 43  | 81  | 59    | 45  | 78  | 67.5  | 47  | 107 | 83.5  | 34  | 94  | 63    | 42  | 89  | 4.46**  |
| Jersey Point             | 61.5  | 13 | 79  | 56.5 | 36 | 83  | 69   | 54  | 91  | 65.5  | 54 | 86  | 75.5  | 54  | 121 | 80.5  | 61  | 88  | 85    | 52  | 116 | 96    | 50  | 117 | 81.5  | 68  | 99  | 4.09**  |
| Antioch                  | 29.5  | 0  | 65  | 37.5 | 7  | 57  | 35.5 | 13  | 69  | 37.5  | 20 | 78  | 48    | 36  | 82  | 53.5  | 39  | 66  | 64    | 36  | 109 | 74    | 28  | 100 | 54    | 39  | 81  | 4.68**  |
| <b>Sacramento River</b>  |       |    |     |      |    |     |      |     |     |       |    |     |       |     |     |       |     |     |       |     |     |       |     |     |       |     |     |         |
| Hood                     | 7.5   | 0  | 55  | 10   | 0  | 41  | 6.5  | 0   | 43  | 12.5  | 0  | 29  | 24    | 6   | 47  | 20.5  | 3   | 39  | 36    | 0   | 59  | 33    | 8   | 72  | 34    | 9   | 63  | 4.03**  |
| Rio Vista                | 14    | 0  | 58  | 22.5 | 1  | 47  | 18.5 | 0   | 50  | 28.5  | 3  | 49  | 31.5  | 14  | 63  | 40.5  | 24  | 49  | 54    | 12  | 67  | 57.5  | 22  | 81  | 45    | 23  | 70  | 5.2**   |
| Decker Island            | 29    | 0  | 63  | 42   | 6  | 63  | 41.5 | 23  | 71  | 44    | 17 | 74  | 55.5  | 39  | 92  | 61    | 44  | 73  | 67    | 32  | 105 | 81    | 31  | 103 | 67    | 50  | 84  | 5.62*** |
| <b>North Delta</b>       |       |    |     |      |    |     |      |     |     |       |    |     |       |     |     |       |     |     |       |     |     |       |     |     |       |     |     |         |
| Upper Cache Slough       | 0     | 0  | 13  | 0    | 0  | 29  | 0    | 0   | 37  | 4.5   | 0  | 21  | 11.5  | 1   | 34  | 17    | 0   | 28  | 20    | 0   | 41  | 24.5  | 0   | 59  | 18    | 0   | 40  | 3.3**   |
| Miners Slough            | 2.5   | 0  | 24  | 4    | 0  | 37  | 2.5  | 0   | 39  | 10    | 0  | 24  | 18.5  | 1   | 41  | 20.5  | 2   | 37  | 30.5  | 0   | 52  | 29.5  | 3   | 70  | 29.5  | 7   | 51  | 4.18**  |
| Liberty Island           | 28    | 0  | 46  | 37   | 8  | 56  | 37.5 | 13  | 68  | 38.5  | 25 | 77  | 48    | 36  | 83  | 55.5  | 47  | 66  | 63.5  | 29  | 111 | 77    | 36  | 108 | 53    | 45  | 80  | 4.94**  |
| Deepwater Ship Channel   | 11.5  | 0  | 32  | 17   | 0  | 44  | 14.5 | 0   | 46  | 24.5  | 7  | 39  | 26.5  | 10  | 48  | 32    | 20  | 42  | 47    | 7   | 62  | 45    | 22  | 75  | 43    | 17  | 65  | 4.71**  |
| Lower Cache Slough       | 6.5   | 0  | 28  | 10   | 0  | 39  | 7.5  | 0   | 43  | 17.5  | 0  | 32  | 25    | 4   | 44  | 28    | 7   | 38  | 39    | 1   | 58  | 35.5  | 6   | 73  | 34    | 9   | 62  | 4.33**  |
| <b>Confluence</b>        |       |    |     |      |    |     |      |     |     |       |    |     |       |     |     |       |     |     |       |     |     |       |     |     |       |     |     |         |
| Mallard Island           | 0     | 0  | 36  | 0    | 0  | 29  | 0    | 0   | 34  | 0     | 0  | 20  | 9     | 0   | 36  | 10    | 0   | 29  | 21    | 0   | 42  | 22    | 0   | 59  | 18.5  | 0   | 44  | 3.2**   |
| <b>Suisun Bay</b>        |       |    |     |      |    |     |      |     |     |       |    |     |       |     |     |       |     |     |       |     |     |       |     |     |       |     |     |         |
| Martinez                 | 0     | 0  | 9   | 0    | 0  | 0   | 0    | 0   | 7   | 0     | 0  | 0   | 0     | 0   | 1   | 0     | 0   | 0   | 0     | 0   | 0   | 0     | 0   | 19  | 0     | 0   | 14  | NA      |
