# Supplementary material for: Coupled Downscaled Climate Models and Ecophysiological Metrics Forecast Habitat Compression for an Endangered Estuarine Fish
Source: PubMed Central journal article supplement (PMC4721863; doi:10.1371/journal.pone.0146724), 2016-01-21
Supplement: pone.0146724.s008.pdf [file pone.0146724.s008.pdf]

**S3 Table. Median, minimum, and maximum values for the number of days per year for the duration of the spawning window (15-20°C), during each decade from 2010-2099, for the adult life stage of Delta Smelt for the least-warming (PCM-B1), most-warming (GFDL-A2) and two intermediate (PCM-A2 and GFDL-B1) climate change scenarios.** The significance value for Trend is from the Mann-Kendal test (NS, P≥0.05; \*, P<0.05; \*\*, P<0.01; \*\*\*, P<0.001; NA, no non-zero values; NT, fewer than 3 values so trend not calculated) and the number is the slope of a regression of decadal medians.

|                          | 2010-2019 |          |          | 2020-2029 |          |          | 2030-2039 |          |          | 2040-2049 |          |          | 2050-2059 |          |          | 2060-2069 |          |          | 2070-2079 |          |          | 2080-2089 |          |          | 2090-2099 |          |          | Trend  |
|--------------------------|-----------|----------|----------|-----------|----------|----------|-----------|----------|----------|-----------|----------|----------|-----------|----------|----------|-----------|----------|----------|-----------|----------|----------|-----------|----------|----------|-----------|----------|----------|--------|
|                          | Median    | Mini-mum | Maxi-mum | Median    | Mini-mum | Maxi-mum | Median    | Mini-mum | Maxi-mum | Median    | Mini-mum | Maxi-mum | Median    | Mini-mum | Maxi-mum | Median    | Mini-mum | Maxi-mum | Median    | Mini-mum | Maxi-mum | Median    | Mini-mum | Maxi-mum | Median    | Mini-mum | Maxi-mum |        |
| <b>Scenario GFDL-A2</b>  |           |          |          |           |          |          |           |          |          |           |          |          |           |          |          |           |          |          |           |          |          |           |          |          |           |          |          |        |
| <b>San Joaquin River</b> |           |          |          |           |          |          |           |          |          |           |          |          |           |          |          |           |          |          |           |          |          |           |          |          |           |          |          |        |
| Mossdale                 | 52.0      | 17       | 75       | 53.5      | 20       | 79       | 49.5      | 21       | 58       | 53.5      | 28       | 71       | 50.5      | 43       | 74       | 45.5      | 36       | 80       | 50.0      | 30       | 62       | 63.5      | 22       | 81       | 45.0      | 33       | 69       | NS     |
| Burns Cut                | 47.5      | 32       | 66       | 47.5      | 20       | 58       | 45.5      | 20       | 51       | 47.0      | 26       | 58       | 49.0      | 43       | 69       | 42.0      | 35       | 73       | 49.0      | 28       | 60       | 55.0      | 31       | 64       | 41.5      | 25       | 59       | NS     |
| Prisoners Point          | 54.0      | 33       | 79       | 52.5      | 19       | 82       | 50.0      | 25       | 58       | 55.5      | 28       | 64       | 58.5      | 46       | 77       | 53.5      | 43       | 84       | 59.0      | 35       | 73       | 61.5      | 38       | 78       | 48.5      | 27       | 76       | NS     |
| Jersey Point             | 47.5      | 28       | 72       | 46.0      | 23       | 66       | 46.5      | 15       | 58       | 49.5      | 40       | 60       | 53.5      | 29       | 79       | 55.5      | 42       | 89       | 61.5      | 32       | 79       | 56.5      | 30       | 84       | 52.5      | 19       | 76       | 1.46*  |
| Antioch                  | 53.5      | 29       | 80       | 54.0      | 22       | 87       | 50.0      | 21       | 58       | 55.5      | 41       | 65       | 58.0      | 51       | 79       | 57.0      | 44       | 87       | 63.0      | 32       | 79       | 69.0      | 31       | 84       | 54.5      | 20       | 80       | 1.28*  |
| <b>Sacramento River</b>  |           |          |          |           |          |          |           |          |          |           |          |          |           |          |          |           |          |          |           |          |          |           |          |          |           |          |          |        |
| Hood                     | 42.0      | 28       | 68       | 44.5      | 23       | 67       | 39.0      | 20       | 59       | 51.0      | 36       | 68       | 49.0      | 27       | 71       | 46.0      | 39       | 66       | 51.5      | 32       | 73       | 54.0      | 39       | 74       | 52.5      | 19       | 74       | 1.51** |
| Rio Vista                | 42.5      | 28       | 70       | 45.0      | 22       | 66       | 39.5      | 20       | 58       | 51.5      | 36       | 68       | 49.5      | 27       | 71       | 46.0      | 39       | 66       | 58.0      | 33       | 68       | 53.0      | 40       | 85       | 56.5      | 18       | 75       | 1.86*  |
| Decker Island            | 48.0      | 33       | 70       | 51.5      | 22       | 71       | 41.0      | 20       | 80       | 53.5      | 37       | 77       | 53.0      | 28       | 76       | 52.5      | 41       | 88       | 69.0      | 33       | 81       | 54.5      | 40       | 86       | 57.0      | 20       | 75       | 1.67*  |
| <b>North Delta</b>       |           |          |          |           |          |          |           |          |          |           |          |          |           |          |          |           |          |          |           |          |          |           |          |          |           |          |          |        |
| Upper Cache Slough       | 50.0      | 27       | 72       | 45.5      | 22       | 72       | 42.0      | 17       | 58       | 53.0      | 38       | 70       | 58.0      | 27       | 81       | 55.0      | 42       | 98       | 63.5      | 32       | 82       | 72.0      | 43       | 96       | 46.5      | 17       | 85       | NS     |
| Miners Slough            | 42.5      | 28       | 71       | 47.5      | 22       | 69       | 45.0      | 18       | 58       | 54.0      | 40       | 70       | 57.0      | 27       | 81       | 58.0      | 41       | 89       | 61.5      | 32       | 80       | 67.0      | 41       | 88       | 58.0      | 18       | 79       | 2.63** |
| Liberty Island           | 43.0      | 27       | 71       | 46.5      | 23       | 67       | 44.0      | 11       | 65       | 51.0      | 36       | 70       | 58.0      | 26       | 80       | 54.5      | 39       | 89       | 58.5      | 32       | 76       | 63.0      | 39       | 87       | 62.5      | 17       | 77       | 2.85*  |
| Deepwater Ship Channel   | 52.0      | 27       | 82       | 46.5      | 16       | 66       | 44.0      | 18       | 58       | 49.0      | 38       | 68       | 58.0      | 19       | 81       | 57.0      | 37       | 96       | 63.0      | 32       | 82       | 74.5      | 30       | 96       | 44.0      | 18       | 83       | NS     |
| Lower Cache Slough       | 50.0      | 28       | 72       | 46.0      | 21       | 71       | 45.0      | 18       | 58       | 53.0      | 38       | 78       | 58.0      | 26       | 80       | 58.5      | 42       | 97       | 64.0      | 32       | 82       | 74.0      | 42       | 96       | 44.5      | 17       | 82       | NS     |
| <b>Confluence</b>        |           |          |          |           |          |          |           |          |          |           |          |          |           |          |          |           |          |          |           |          |          |           |          |          |           |          |          |        |
| Mallard Island           | 51.5      | 32       | 73       | 54.0      | 23       | 71       | 46.5      | 21       | 83       | 54.5      | 38       | 78       | 58.5      | 30       | 78       | 58.5      | 43       | 90       | 71.0      | 35       | 83       | 56.5      | 42       | 87       | 63.0      | 20       | 76       | 1.78*  |
| <b>Suisun Bay</b>        |           |          |          |           |          |          |           |          |          |           |          |          |           |          |          |           |          |          |           |          |          |           |          |          |           |          |          |        |
| Martinez                 | 59.0      | 38       | 90       | 63.0      | 24       | 80       | 51.5      | 22       | 94       | 61.0      | 38       | 79       | 60.5      | 30       | 81       | 60.0      | 46       | 90       | 72.5      | 35       | 102      | 58.0      | 44       | 98       | 62.0      | 22       | 79       | NS     |
| <b>Scenario GFDL-B1</b>  |           |          |          |           |          |          |           |          |          |           |          |          |           |          |          |           |          |          |           |          |          |           |          |          |           |          |          |        |
| <b>San Joaquin River</b> |           |          |          |           |          |          |           |          |          |           |          |          |           |          |          |           |          |          |           |          |          |           |          |          |           |          |          |        |
| Mossdale                 | 44.5      | 21       | 62       | 35.0      | 19       | 71       | 60.5      | 29       | 81       | 53.0      | 18       | 70       | 38.0      | 23       | 96       | 46.0      | 34       | 89       | 52.0      | 27       | 95       | 47.5      | 27       | 69       | 53.5      | 17       | 86       | NS     |
| Burns Cut                | 43.5      | 22       | 57       | 34.0      | 24       | 59       | 49.5      | 26       | 65       | 49.5      | 21       | 62       | 43.0      | 27       | 57       | 46.5      | 39       | 64       | 41.0      | 27       | 57       | 46.0      | 28       | 60       | 40.5      | 18       | 73       | NS     |
| Prisoners Point          | 50.5      | 23       | 60       | 41.5      | 30       | 71       | 59.5      | 27       | 81       | 54.5      | 38       | 71       | 47.5      | 36       | 76       | 51.0      | 38       | 78       | 51.0      | 29       | 81       | 55.0      | 33       | 80       | 46.5      | 20       | 83       | NS     |
| Jersey Point             | 51.5      | 27       | 58       | 41.0      | 30       | 63       | 55.5      | 27       | 88       | 55.0      | 38       | 74       | 49.5      | 36       | 82       | 47.5      | 31       | 87       | 55.5      | 33       | 98       | 56.0      | 31       | 65       | 52.5      | 29       | 79       | NS     |
| Antioch                  | 48.5      | 29       | 65       | 39.0      | 30       | 64       | 60.5      | 27       | 105      | 53.5      | 39       | 75       | 49.0      | 36       | 80       | 52.5      | 38       | 82       | 50.5      | 33       | 88       | 56.5      | 40       | 66       | 58.0      | 20       | 84       | NS     |
| <b>Sacramento River</b>  |           |          |          |           |          |          |           |          |          |           |          |          |           |          |          |           |          |          |           |          |          |           |          |          |           |          |          |        |
| Hood                     | 50.0      | 26       | 56       | 43.0      | 28       | 61       | 50.5      | 34       | 86       | 48.0      | 15       | 64       | 45.5      | 28       | 82       | 52.0      | 23       | 86       | 56.0      | 32       | 93       | 45.0      | 31       | 57       | 51.5      | 34       | 72       | NS     |
| Rio Vista                | 49.5      | 26       | 55       | 41.0      | 28       | 61       | 50.5      | 37       | 87       | 51.0      | 15       | 65       | 46.0      | 28       | 82       | 51.5      | 23       | 86       | 56.5      | 32       | 93       | 44.5      | 31       | 56       | 50.5      | 33       | 69       | NS     |
| Decker Island            | 53.0      | 19       | 70       | 49.0      | 31       | 61       | 63.5      | 33       | 89       | 55.5      | 19       | 70       | 47.5      | 29       | 85       | 55.0      | 31       | 87       | 59.5      | 33       | 96       | 47.0      | 31       | 66       | 52.0      | 34       | 72       | NS     |
| <b>North Delta</b>       |           |          |          |           |          |          |           |          |          |           |          |          |           |          |          |           |          |          |           |          |          |           |          |          |           |          |          |        |
| Upper Cache Slough       | 52.0      | 27       | 68       | 50.5      | 31       | 73       | 64.0      | 25       | 113      | 56.5      | 36       | 85       | 47.5      | 17       | 83       | 50.5      | 30       | 117      | 55.5      | 31       | 103      | 55.5      | 30       | 83       | 63.5      | 20       | 83       | NS     |
| Miners Slough            | 52.0      | 27       | 61       | 46.5      | 30       | 63       | 59.0      | 25       | 98       | 56.0      | 36       | 74       | 51.5      | 34       | 83       | 50.0      | 31       | 88       | 55.5      | 31       | 101      | 53.5      | 31       | 66       | 59.0      | 20       | 78       | NS     |
| Liberty Island           | 52.5      | 27       | 58       | 44.5      | 31       | 62       | 57.5      | 25       | 88       | 56.0      | 38       | 74       | 47.5      | 34       | 83       | 51.5      | 31       | 88       | 58.0      | 32       | 102      | 53.5      | 30       | 66       | 53.0      | 20       | 74       | NS     |
| Deepwater Ship Channel   | 49.0      | 29       | 60       | 40.0      | 31       | 72       | 64.5      | 26       | 112      | 55.5      | 37       | 83       | 46.0      | 20       | 84       | 49.5      | 33       | 116      | 50.0      | 32       | 102      | 56.5      | 40       | 81       | 60.0      | 20       | 79       | NS     |
| Lower Cache Slough       | 53.0      | 28       | 68       | 47.0      | 31       | 64       | 64.0      | 25       | 112      | 57.0      | 36       | 83       | 47.5      | 21       | 83       | 51.0      | 34       | 116      | 56.5      | 32       | 102      | 56.5      | 30       | 82       | 60.5      | 20       | 81       | NS     |
| <b>Confluence</b>        |           |          |          |           |          |          |           |          |          |           |          |          |           |          |          |           |          |          |           |          |          |           |          |          |           |          |          |        |
| Mallard Island           | 55.0      | 37       | 70       | 50.0      | 35       | 63       | 64.0      | 39       | 89       | 63.5      | 42       | 74       | 49.0      | 30       | 85       | 59.0      | 31       | 88       | 65.5      | 33       | 101      | 51.0      | 32       | 69       | 61.0      | 36       | 82       | NS     |
| <b>Suisun Bay</b>        |           |          |          |           |          |          |           |          |          |           |          |          |           |          |          |           |          |          |           |          |          |           |          |          |           |          |          |        |
| Martinez                 | 58.5      | 43       | 73       | 56.0      | 39       | 70       | 73.0      | 40       | 103      | 63.0      | 21       | 75       | 53.0      | 47       | 87       | 62.0      | 39       | 95       | 65.5      | 40       | 98       | 53.0      | 33       | 73       | 63.5      | 38       | 82       | NS     |

**Scenario PCM-A2**

**San Joaquin River**

|                 |      |    |    |      |    |    |      |    |    |      |    |    |      |    |    |      |    |    |      |    |    |      |    |    |      |    |    |    |
|-----------------|------|----|----|------|----|----|------|----|----|------|----|----|------|----|----|------|----|----|------|----|----|------|----|----|------|----|----|----|
| Mossdale        | 48.0 | 28 | 65 | 52.0 | 40 | 69 | 51.5 | 20 | 72 | 49.0 | 33 | 55 | 52.5 | 34 | 77 | 58.5 | 15 | 75 | 40.0 | 34 | 63 | 50.5 | 34 | 78 | 51.0 | 28 | 77 | NS |
| Burns Cut       | 43.0 | 28 | 62 | 49.0 | 40 | 55 | 45.0 | 30 | 69 | 43.5 | 26 | 49 | 42.5 | 30 | 63 | 50.0 | 20 | 64 | 39.0 | 32 | 56 | 50.0 | 30 | 66 | 39.0 | 28 | 72 | NS |
| Prisoners Point | 56.5 | 35 | 66 | 55.5 | 42 | 77 | 51.0 | 37 | 77 | 47.5 | 25 | 58 | 50.5 | 32 | 68 | 65.0 | 20 | 73 | 50.0 | 39 | 66 | 55.5 | 44 | 68 | 47.0 | 29 | 77 | NS |
| Jersey Point    | 53.5 | 23 | 77 | 50.5 | 33 | 88 | 59.5 | 37 | 79 | 43.0 | 27 | 60 | 52.0 | 31 | 82 | 61.0 | 24 | 82 | 57.0 | 42 | 80 | 53.0 | 34 | 75 | 42.0 | 31 | 69 | NS |
| Antioch         | 51.5 | 30 | 69 | 54.5 | 42 | 87 | 57.5 | 37 | 79 | 45.0 | 22 | 72 | 51.0 | 32 | 71 | 69.0 | 21 | 77 | 57.5 | 43 | 68 | 62.5 | 43 | 74 | 46.0 | 33 | 79 | NS |

**Sacramento River**

|               |      |    |    |      |    |    |      |    |    |      |    |    |      |    |    |      |    |    |      |    |    |      |    |    |      |    |    |    |
|---------------|------|----|----|------|----|----|------|----|----|------|----|----|------|----|----|------|----|----|------|----|----|------|----|----|------|----|----|----|
| Hood          | 52.5 | 22 | 69 | 49.5 | 32 | 88 | 61.5 | 48 | 74 | 47.5 | 27 | 65 | 53.0 | 31 | 80 | 62.5 | 49 | 85 | 57.5 | 47 | 76 | 51.0 | 35 | 70 | 41.5 | 27 | 65 | NS |
| Rio Vista     | 52.5 | 22 | 77 | 49.5 | 32 | 88 | 58.5 | 37 | 74 | 42.0 | 27 | 60 | 53.5 | 31 | 80 | 62.0 | 49 | 82 | 57.5 | 44 | 78 | 50.5 | 33 | 70 | 41.5 | 27 | 65 | NS |
| Decker Island | 54.5 | 24 | 66 | 62.5 | 33 | 80 | 60.0 | 45 | 77 | 48.0 | 26 | 70 | 51.5 | 34 | 83 | 65.5 | 49 | 87 | 59.5 | 47 | 76 | 53.5 | 41 | 71 | 43.5 | 27 | 65 | NS |

**North Delta**

|                        |      |    |    |      |    |    |      |    |    |      |    |    |      |    |     |      |    |    |      |    |    |      |    |    |      |    |    |    |
|------------------------|------|----|----|------|----|----|------|----|----|------|----|----|------|----|-----|------|----|----|------|----|----|------|----|----|------|----|----|----|
| Upper Cache Slough     | 54.0 | 14 | 88 | 52.0 | 32 | 91 | 60.5 | 39 | 81 | 42.5 | 17 | 84 | 58.5 | 30 | 117 | 64.5 | 20 | 92 | 58.5 | 30 | 83 | 53.0 | 32 | 93 | 42.5 | 25 | 68 | NS |
| Miners Slough          | 54.0 | 15 | 84 | 54.0 | 32 | 90 | 60.0 | 39 | 80 | 43.0 | 17 | 82 | 59.0 | 31 | 116 | 64.0 | 19 | 91 | 60.0 | 46 | 83 | 53.0 | 33 | 77 | 42.5 | 27 | 67 | NS |
| Liberty Island         | 53.5 | 14 | 83 | 54.0 | 31 | 90 | 59.5 | 38 | 81 | 42.5 | 26 | 72 | 58.5 | 31 | 82  | 63.5 | 19 | 90 | 58.5 | 46 | 82 | 55.0 | 32 | 76 | 42.0 | 16 | 68 | NS |
| Deepwater Ship Channel | 53.0 | 12 | 75 | 50.0 | 32 | 90 | 58.0 | 37 | 80 | 42.0 | 17 | 76 | 50.5 | 30 | 88  | 66.0 | 20 | 93 | 59.0 | 38 | 82 | 60.0 | 33 | 89 | 43.5 | 23 | 71 | NS |
| Lower Cache Slough     | 54.0 | 14 | 85 | 50.5 | 32 | 90 | 62.0 | 38 | 80 | 43.0 | 18 | 83 | 58.0 | 30 | 117 | 66.5 | 19 | 92 | 60.0 | 31 | 83 | 53.5 | 33 | 87 | 42.5 | 32 | 69 | NS |

**Confluence**

|                |      |    |    |      |    |    |      |    |    |      |    |    |      |    |    |      |    |    |      |    |    |      |    |    |      |    |    |    |
|----------------|------|----|----|------|----|----|------|----|----|------|----|----|------|----|----|------|----|----|------|----|----|------|----|----|------|----|----|----|
| Mallard Island | 55.0 | 25 | 82 | 64.5 | 33 | 90 | 63.0 | 49 | 82 | 49.0 | 27 | 73 | 55.0 | 39 | 83 | 67.0 | 51 | 90 | 61.0 | 49 | 81 | 57.0 | 41 | 77 | 44.0 | 28 | 68 | NS |
|----------------|------|----|----|------|----|----|------|----|----|------|----|----|------|----|----|------|----|----|------|----|----|------|----|----|------|----|----|----|

**Suisun Bay**

|          |      |    |    |      |    |    |      |    |    |      |    |    |      |    |    |      |    |    |      |    |    |      |    |    |      |    |    |    |
|----------|------|----|----|------|----|----|------|----|----|------|----|----|------|----|----|------|----|----|------|----|----|------|----|----|------|----|----|----|
| Martinez | 58.0 | 41 | 84 | 71.0 | 34 | 94 | 68.5 | 58 | 79 | 58.5 | 29 | 85 | 78.5 | 45 | 86 | 69.5 | 56 | 93 | 63.0 | 49 | 84 | 71.5 | 42 | 85 | 58.0 | 32 | 69 | NS |
|----------|------|----|----|------|----|----|------|----|----|------|----|----|------|----|----|------|----|----|------|----|----|------|----|----|------|----|----|----|

**Scenario PCM-B1**

**San Joaquin River**

|                 |      |    |    |      |    |    |      |    |    |      |    |    |      |    |    |      |    |    |      |    |    |      |    |    |      |    |    |    |
|-----------------|------|----|----|------|----|----|------|----|----|------|----|----|------|----|----|------|----|----|------|----|----|------|----|----|------|----|----|----|
| Mossdale        | 46.0 | 29 | 76 | 47.5 | 9  | 65 | 36.0 | 11 | 66 | 52.5 | 26 | 78 | 45.5 | 20 | 59 | 29.0 | 17 | 48 | 44.0 | 26 | 60 | 48.0 | 36 | 59 | 53.0 | 27 | 66 | NS |
| Burns Cut       | 43.0 | 33 | 68 | 44.5 | 27 | 60 | 35.5 | 29 | 55 | 46.0 | 30 | 69 | 44.0 | 32 | 54 | 34.5 | 28 | 59 | 43.5 | 29 | 57 | 44.5 | 32 | 56 | 49.0 | 27 | 57 | NS |
| Prisoners Point | 53.5 | 41 | 74 | 51.0 | 43 | 68 | 38.0 | 32 | 64 | 49.0 | 36 | 75 | 51.0 | 32 | 72 | 47.5 | 26 | 68 | 54.0 | 38 | 79 | 55.0 | 32 | 91 | 52.0 | 31 | 72 | NS |
| Jersey Point    | 56.5 | 36 | 65 | 52.0 | 36 | 70 | 50.5 | 30 | 88 | 54.5 | 34 | 78 | 55.0 | 39 | 65 | 58.0 | 32 | 71 | 55.0 | 33 | 75 | 52.0 | 28 | 93 | 56.5 | 30 | 78 | NS |
| Antioch         | 57.5 | 42 | 72 | 55.5 | 42 | 70 | 44.5 | 31 | 65 | 53.5 | 38 | 75 | 56.0 | 26 | 72 | 57.0 | 33 | 74 | 60.0 | 37 | 77 | 53.0 | 32 | 93 | 54.5 | 32 | 80 | NS |

**Sacramento River**

|               |      |    |    |      |    |    |      |    |    |      |    |    |      |    |    |      |    |    |      |    |    |      |    |    |      |    |    |    |
|---------------|------|----|----|------|----|----|------|----|----|------|----|----|------|----|----|------|----|----|------|----|----|------|----|----|------|----|----|----|
| Hood          | 57.0 | 21 | 64 | 47.0 | 35 | 70 | 50.5 | 25 | 87 | 49.5 | 34 | 79 | 52.0 | 35 | 63 | 57.5 | 30 | 71 | 53.5 | 35 | 75 | 51.0 | 19 | 84 | 53.5 | 30 | 78 | NS |
| Rio Vista     | 57.0 | 21 | 64 | 47.0 | 35 | 70 | 52.0 | 29 | 87 | 49.5 | 34 | 79 | 53.5 | 35 | 64 | 57.0 | 30 | 71 | 51.0 | 36 | 75 | 51.5 | 19 | 91 | 54.5 | 30 | 77 | NS |
| Decker Island | 57.5 | 25 | 66 | 51.5 | 36 | 72 | 63.0 | 31 | 88 | 50.0 | 35 | 90 | 55.5 | 37 | 71 | 55.0 | 29 | 72 | 57.0 | 38 | 76 | 51.0 | 21 | 85 | 55.5 | 31 | 85 | NS |

**North Delta**

|                        |      |    |    |      |    |    |      |    |    |      |    |    |      |    |    |      |    |    |      |    |    |      |    |    |      |    |    |    |
|------------------------|------|----|----|------|----|----|------|----|----|------|----|----|------|----|----|------|----|----|------|----|----|------|----|----|------|----|----|----|
| Upper Cache Slough     | 55.0 | 26 | 64 | 58.5 | 33 | 73 | 48.0 | 32 | 68 | 49.5 | 33 | 83 | 56.0 | 16 | 66 | 59.5 | 20 | 82 | 58.5 | 33 | 78 | 52.5 | 17 | 93 | 58.0 | 28 | 86 | NS |
| Miners Slough          | 57.0 | 34 | 65 | 53.5 | 34 | 72 | 51.0 | 30 | 68 | 49.5 | 34 | 82 | 55.5 | 18 | 65 | 58.5 | 20 | 78 | 57.0 | 33 | 76 | 52.0 | 18 | 94 | 57.5 | 29 | 86 | NS |
| Liberty Island         | 57.5 | 27 | 65 | 53.5 | 34 | 72 | 48.5 | 29 | 67 | 50.0 | 34 | 82 | 54.5 | 37 | 76 | 58.0 | 31 | 78 | 56.5 | 33 | 77 | 52.0 | 17 | 93 | 53.5 | 30 | 85 | NS |
| Deepwater Ship Channel | 57.0 | 40 | 65 | 57.0 | 38 | 71 | 46.0 | 31 | 65 | 53.5 | 38 | 81 | 55.5 | 23 | 65 | 58.5 | 21 | 74 | 62.0 | 34 | 78 | 52.5 | 29 | 94 | 57.5 | 32 | 81 | NS |
| Lower Cache Slough     | 56.0 | 34 | 65 | 57.5 | 34 | 72 | 47.5 | 30 | 65 | 57.0 | 34 | 82 | 56.5 | 17 | 65 | 59.5 | 20 | 82 | 57.0 | 33 | 78 | 52.5 | 31 | 93 | 58.0 | 33 | 86 | NS |

**Confluence**

|                |      |    |    |      |    |    |      |    |    |      |    |    |      |    |    |      |    |    |      |    |    |      |    |    |      |    |    |    |
|----------------|------|----|----|------|----|----|------|----|----|------|----|----|------|----|----|------|----|----|------|----|----|------|----|----|------|----|----|----|
| Mallard Island | 58.5 | 40 | 66 | 58.5 | 36 | 74 | 63.0 | 31 | 89 | 57.0 | 37 | 83 | 60.5 | 38 | 75 | 59.5 | 31 | 78 | 58.5 | 45 | 77 | 53.0 | 21 | 94 | 60.5 | 32 | 85 | NS |
|----------------|------|----|----|------|----|----|------|----|----|------|----|----|------|----|----|------|----|----|------|----|----|------|----|----|------|----|----|----|

**Suisun Bay**

|          |      |    |    |      |    |    |      |    |    |      |    |    |      |    |    |      |    |    |      |    |    |      |    |    |      |    |    |    |
|----------|------|----|----|------|----|----|------|----|----|------|----|----|------|----|----|------|----|----|------|----|----|------|----|----|------|----|----|----|
| Martinez | 59.5 | 26 | 72 | 60.5 | 38 | 79 | 72.0 | 34 | 90 | 64.5 | 52 | 93 | 60.0 | 39 | 77 | 60.0 | 32 | 81 | 61.0 | 47 | 79 | 58.5 | 37 | 95 | 66.5 | 35 | 89 | NS |
|----------|------|----|----|------|----|----|------|----|----|------|----|----|------|----|----|------|----|----|------|----|----|------|----|----|------|----|----|----|
