# Supplementary material for: Coupled Downscaled Climate Models and Ecophysiological Metrics Forecast Habitat Compression for an Endangered Estuarine Fish
Source: PubMed Central journal article supplement (PMC4721863; doi:10.1371/journal.pone.0146724), 2016-01-21
Supplement: pone.0146724.s009.pdf [file pone.0146724.s009.pdf]

**S4 Table. Median, minimum, and maximum values for the julian date of the beginning of the spawning window (15-20°C) each year, during each decade from 2010-2099, for the adult life stage of Delta Smelt for the least-warming (PCM-B1), most-warming (GFDL-A2) and two intermediate (PCM-A2 and GFDL-B1) climate change scenarios.** The significance value for Trend is from the Mann-Kendal test (NS, P≥0.05; \*, P<0.05; \*\*, P<0.01; \*\*\*, P<0.001; NA, no non-zero values; NT, fewer than 3 values so trend not calculated) and the number is the slope of a regression of decadal medians.

|                          | 2010-2019 |          |          | 2020-2029 |          |          | 2030-2039 |          |          | 2040-2049 |          |          | 2050-2059 |          |          | 2060-2069 |          |          | 2070-2079 |          |          | 2080-2089 |          |          | 2090-2099 |          |          | Trend    |
|--------------------------|-----------|----------|----------|-----------|----------|----------|-----------|----------|----------|-----------|----------|----------|-----------|----------|----------|-----------|----------|----------|-----------|----------|----------|-----------|----------|----------|-----------|----------|----------|----------|
|                          | Median    | Mini-mum | Maxi-mum | Median    | Mini-mum | Maxi-mum | Median    | Mini-mum | Maxi-mum | Median    | Mini-mum | Maxi-mum | Median    | Mini-mum | Maxi-mum | Median    | Mini-mum | Maxi-mum | Median    | Mini-mum | Maxi-mum | Median    | Mini-mum | Maxi-mum | Median    | Mini-mum | Maxi-mum |          |
| <b>Scenario GFDL-A2</b>  |           |          |          |           |          |          |           |          |          |           |          |          |           |          |          |           |          |          |           |          |          |           |          |          |           |          |          |          |
| <b>San Joaquin River</b> |           |          |          |           |          |          |           |          |          |           |          |          |           |          |          |           |          |          |           |          |          |           |          |          |           |          |          |          |
| Mossdale                 | 78.5      | 60       | 97       | 75.5      | 55       | 102      | 81.0      | 69       | 95       | 75.5      | 52       | 101      | 72.5      | 59       | 94       | 75.0      | 42       | 87       | 68.5      | 56       | 77       | 49.0      | 34       | 78       | 57.5      | 51       | 76       | -3.56**  |
| Burns Cut                | 84.0      | 77       | 98       | 82.0      | 73       | 104      | 88.0      | 81       | 97       | 81.0      | 73       | 103      | 77.0      | 68       | 95       | 78.5      | 52       | 88       | 70.5      | 64       | 78       | 68.5      | 54       | 88       | 65.0      | 59       | 87       | -2.57**  |
| Prisoners Point          | 82.5      | 75       | 99       | 84.5      | 70       | 105      | 86.5      | 81       | 96       | 80.0      | 73       | 102      | 75.5      | 67       | 95       | 77.5      | 51       | 88       | 70.0      | 62       | 78       | 64.0      | 48       | 79       | 64.5      | 57       | 87       | -2.82**  |
| Jersey Point             | 93.0      | 79       | 112      | 96.5      | 78       | 109      | 98.5      | 85       | 119      | 93.0      | 81       | 107      | 83.5      | 69       | 105      | 83.0      | 51       | 93       | 72.5      | 65       | 104      | 75.5      | 55       | 91       | 70.5      | 61       | 98       | -3.58**  |
| Antioch                  | 89.5      | 77       | 105      | 86.0      | 72       | 108      | 91.0      | 82       | 103      | 84.5      | 79       | 105      | 77.0      | 67       | 96       | 79.0      | 50       | 90       | 70.0      | 63       | 85       | 64.0      | 48       | 87       | 64.5      | 52       | 96       | -3.56**  |
| <b>Sacramento River</b>  |           |          |          |           |          |          |           |          |          |           |          |          |           |          |          |           |          |          |           |          |          |           |          |          |           |          |          |          |
| Hood                     | 98.0      | 82       | 113      | 101.0     | 92       | 110      | 103.0     | 88       | 120      | 98.5      | 81       | 112      | 93.0      | 77       | 108      | 93.5      | 75       | 100      | 81.0      | 72       | 105      | 82.5      | 69       | 92       | 79.5      | 64       | 99       | -2.98**  |
| Rio Vista                | 97.0      | 81       | 113      | 100.5     | 92       | 110      | 103.0     | 88       | 120      | 97.5      | 81       | 112      | 93.0      | 76       | 108      | 91.0      | 68       | 100      | 78.5      | 72       | 105      | 82.5      | 57       | 92       | 78.5      | 63       | 99       | -3.06**  |
| Decker Island            | 99.0      | 82       | 114      | 101.5     | 92       | 111      | 104.5     | 89       | 124      | 99.0      | 82       | 113      | 93.5      | 77       | 109      | 90.0      | 54       | 102      | 79.5      | 69       | 105      | 79.0      | 57       | 92       | 79.0      | 63       | 99       | -3.44**  |
| <b>North Delta</b>       |           |          |          |           |          |          |           |          |          |           |          |          |           |          |          |           |          |          |           |          |          |           |          |          |           |          |          |          |
| Upper Cache Slough       | 94.5      | 76       | 112      | 96.5      | 67       | 109      | 95.0      | 84       | 119      | 93.0      | 79       | 105      | 79.0      | 66       | 107      | 83.5      | 42       | 99       | 70.5      | 62       | 87       | 56.5      | 46       | 88       | 67.5      | 52       | 98       | -4.78**  |
| Miners Slough            | 95.5      | 78       | 112      | 98.0      | 70       | 109      | 95.0      | 85       | 119      | 93.0      | 80       | 105      | 86.5      | 67       | 107      | 83.5      | 51       | 94       | 72.5      | 64       | 104      | 69.0      | 47       | 89       | 69.5      | 58       | 98       | -4.09*** |
| Liberty Island           | 96.5      | 79       | 113      | 100.5     | 78       | 109      | 99.0      | 86       | 120      | 96.5      | 80       | 112      | 87.5      | 68       | 108      | 84.5      | 51       | 99       | 74.5      | 65       | 105      | 77.5      | 48       | 91       | 71.0      | 61       | 99       | -4.92**  |
| Deepwater Ship Channel   | 90.5      | 76       | 112      | 95.5      | 67       | 108      | 92.5      | 84       | 119      | 91.5      | 79       | 104      | 79.5      | 66       | 106      | 79.5      | 43       | 93       | 70.0      | 62       | 86       | 54.5      | 39       | 88       | 64.5      | 53       | 97       | -4.73**  |
| Lower Cache Slough       | 92.0      | 76       | 112      | 96.5      | 67       | 109      | 94.5      | 84       | 119      | 91.5      | 79       | 105      | 79.5      | 67       | 107      | 82.5      | 43       | 93       | 70.5      | 62       | 87       | 56.0      | 39       | 88       | 65.5      | 55       | 98       | -4.74**  |
| <b>Confluence</b>        |           |          |          |           |          |          |           |          |          |           |          |          |           |          |          |           |          |          |           |          |          |           |          |          |           |          |          |          |
| Mallard Island           | 95.5      | 79       | 113      | 98.5      | 78       | 110      | 99.5      | 86       | 120      | 96.0      | 81       | 112      | 87.0      | 75       | 107      | 84.0      | 52       | 98       | 76.5      | 67       | 104      | 78.0      | 56       | 91       | 72.5      | 62       | 99       | -3.53**  |
| <b>Suisun Bay</b>        |           |          |          |           |          |          |           |          |          |           |          |          |           |          |          |           |          |          |           |          |          |           |          |          |           |          |          |          |
| Martinez                 | 97.0      | 80       | 113      | 101.0     | 79       | 110      | 103.5     | 88       | 124      | 98.5      | 81       | 113      | 93.0      | 76       | 109      | 86.0      | 53       | 100      | 78.5      | 68       | 105      | 78.5      | 57       | 92       | 75.5      | 62       | 99       | -3.60**  |
| <b>Scenario GFDL-B1</b>  |           |          |          |           |          |          |           |          |          |           |          |          |           |          |          |           |          |          |           |          |          |           |          |          |           |          |          |          |
| <b>San Joaquin River</b> |           |          |          |           |          |          |           |          |          |           |          |          |           |          |          |           |          |          |           |          |          |           |          |          |           |          |          |          |
| Mossdale                 | 91.5      | 73       | 98       | 85.5      | 77       | 107      | 71.0      | 41       | 96       | 74.0      | 57       | 93       | 78.0      | 67       | 97       | 72.0      | 50       | 88       | 69.5      | 41       | 99       | 74.0      | 54       | 94       | 70.0      | 45       | 81       | -2.09*   |
| Burns Cut                | 92.5      | 76       | 100      | 93.0      | 84       | 108      | 78.0      | 65       | 96       | 79.5      | 70       | 94       | 85.0      | 71       | 98       | 76.5      | 70       | 88       | 86.5      | 62       | 101      | 78.5      | 62       | 95       | 78.5      | 61       | 96       | NS       |
| Prisoners Point          | 93.5      | 74       | 99       | 92.5      | 80       | 108      | 77.0      | 65       | 96       | 79.0      | 68       | 95       | 85.0      | 70       | 98       | 76.0      | 69       | 90       | 86.0      | 60       | 100      | 78.0      | 56       | 95       | 78.0      | 60       | 95       | NS       |
| Jersey Point             | 103.0     | 84       | 108      | 101.0     | 90       | 113      | 87.5      | 66       | 99       | 90.5      | 71       | 99       | 96.0      | 73       | 113      | 85.0      | 77       | 94       | 89.0      | 66       | 107      | 82.5      | 62       | 104      | 89.5      | 66       | 106      | -1.87*   |
| Antioch                  | 96.0      | 76       | 106      | 94.5      | 87       | 109      | 78.5      | 47       | 98       | 82.0      | 70       | 98       | 88.0      | 71       | 101      | 77.0      | 70       | 92       | 87.5      | 60       | 105      | 80.5      | 60       | 96       | 80.0      | 60       | 98       | NS       |
| <b>Sacramento River</b>  |           |          |          |           |          |          |           |          |          |           |          |          |           |          |          |           |          |          |           |          |          |           |          |          |           |          |          |          |
| Hood                     | 103.5     | 90       | 111      | 103.5     | 91       | 117      | 95.0      | 68       | 103      | 96.5      | 90       | 113      | 99.5      | 87       | 114      | 95.5      | 79       | 99       | 95.0      | 67       | 108      | 94.0      | 66       | 107      | 93.0      | 78       | 112      | -1.19**  |
| Rio Vista                | 103.5     | 90       | 109      | 103.5     | 91       | 117      | 94.5      | 67       | 101      | 94.5      | 90       | 113      | 99.5      | 86       | 114      | 95.0      | 79       | 98       | 92.5      | 67       | 108      | 94.0      | 66       | 106      | 93.0      | 76       | 112      | -1.23*   |
| Decker Island            | 105.5     | 91       | 123      | 105.0     | 92       | 118      | 95.0      | 67       | 105      | 97.0      | 91       | 113      | 100.5     | 87       | 115      | 96.5      | 79       | 99       | 98.0      | 67       | 109      | 95.0      | 66       | 109      | 94.0      | 76       | 113      | -1.18*   |
| <b>North Delta</b>       |           |          |          |           |          |          |           |          |          |           |          |          |           |          |          |           |          |          |           |          |          |           |          |          |           |          |          |          |
| Upper Cache Slough       | 101.5     | 74       | 112      | 97.0      | 79       | 114      | 88.0      | 41       | 100      | 92.0      | 68       | 99       | 95.5      | 68       | 114      | 77.0      | 50       | 95       | 87.0      | 59       | 106      | 85.5      | 55       | 105      | 81.0      | 45       | 99       | -2.23**  |
| Miners Slough            | 102.5     | 84       | 108      | 100.5     | 89       | 117      | 90.5      | 66       | 100      | 92.5      | 70       | 99       | 96.5      | 71       | 114      | 78.5      | 70       | 95       | 88.0      | 60       | 107      | 86.0      | 59       | 105      | 88.0      | 66       | 107      | -2.01*   |
| Liberty Island           | 102.5     | 84       | 112      | 103.0     | 90       | 117      | 94.5      | 66       | 101      | 92.5      | 71       | 100      | 99.0      | 71       | 114      | 83.0      | 77       | 96       | 89.0      | 63       | 107      | 87.0      | 62       | 106      | 92.0      | 75       | 112      | -1.84*   |
| Deepwater Ship Channel   | 98.5      | 74       | 107      | 93.5      | 80       | 112      | 81.5      | 42       | 98       | 90.5      | 67       | 98       | 92.5      | 68       | 113      | 76.5      | 51       | 93       | 87.0      | 59       | 105      | 80.0      | 56       | 96       | 80.5      | 65       | 98       | -1.93*   |
| Lower Cache Slough       | 99.0      | 74       | 108      | 100.5     | 88       | 117      | 82.0      | 42       | 99       | 91.5      | 68       | 99       | 94.0      | 70       | 114      | 77.0      | 51       | 94       | 87.0      | 59       | 106      | 80.5      | 56       | 105      | 80.5      | 66       | 99       | -2.31*   |
| <b>Confluence</b>        |           |          |          |           |          |          |           |          |          |           |          |          |           |          |          |           |          |          |           |          |          |           |          |          |           |          |          |          |
| Mallard Island           | 103.0     | 85       | 109      | 102.0     | 90       | 117      | 92.0      | 66       | 100      | 92.5      | 72       | 100      | 98.5      | 75       | 114      | 86.0      | 78       | 96       | 89.5      | 66       | 108      | 93.0      | 63       | 105      | 90.5      | 75       | 107      | NS       |
| <b>Suisun Bay</b>        |           |          |          |           |          |          |           |          |          |           |          |          |           |          |          |           |          |          |           |          |          |           |          |          |           |          |          |          |
| Martinez                 | 104.5     | 90       | 123      | 103.5     | 91       | 117      | 94.5      | 66       | 103      | 96.0      | 83       | 113      | 99.5      | 84       | 114      | 90.0      | 78       | 98       | 92.5      | 66       | 108      | 94.0      | 63       | 107      | 93.0      | 75       | 113      | -1.41*   |
| <b>Scenario PCM-A2</b>   |           |          |          |           |          |          |           |          |          |           |          |          |           |          |          |           |          |          |           |          |          |           |          |          |           |          |          |          |
| <b>San Joaquin River</b> |           |          |          |           |          |          |           |          |          |           |          |          |           |          |          |           |          |          |           |          |          |           |          |          |           |          |          |          |
