# Supplementary material for: Coupled Downscaled Climate Models and Ecophysiological Metrics Forecast Habitat Compression for an Endangered Estuarine Fish
Source: PubMed Central journal article supplement (PMC4721863; doi:10.1371/journal.pone.0146724), 2016-01-21
Supplement: pone.0146724.s010.pdf [file pone.0146724.s010.pdf]

**S5 Table. Median, minimum, and maximum values for the julian date of the beginning of the maturation window (last day of 24°C to beginning of the spawning window) each year during each decade from 2010-2099, for the adult life stage of Delta Smelt for the least-warming (PCM-B1), most-warming (GFDL-A2) and two intermediate (PCM-A2 and GFDL-B1) climate change scenarios.** The significance value for Trend is from the Mann-Kendal test (NS, P≥0.05; \*, P<0.05; \*\*, P<0.01; \*\*\*, P<0.001; NA, no non-zero values; NT, fewer than 3 values so trend not calculated) and the number is the slope of a regression of decadal medians.

|                          | 2010-2019   |        |          | 2020-2029 |             |        | 2030-2039 |          |             | 2040-2049 |          |          | 2050-2059   |        |          | 2060-2069 |             |        | 2070-2079 |          |             | 2080-2089 |          |          | 2090-2099   |        |          | Trend |          |       |     |     |    |       |     |     |         |
|--------------------------|-------------|--------|----------|-----------|-------------|--------|-----------|----------|-------------|-----------|----------|----------|-------------|--------|----------|-----------|-------------|--------|-----------|----------|-------------|-----------|----------|----------|-------------|--------|----------|-------|----------|-------|-----|-----|----|-------|-----|-----|---------|
|                          | Sample size | Median | Mini-mum | Maxi-mum  | Sample size | Median | Mini-mum  | Maxi-mum | Sample size | Median    | Mini-mum | Maxi-mum | Sample size | Median | Mini-mum | Maxi-mum  | Sample size | Median | Mini-mum  | Maxi-mum | Sample size | Median    | Mini-mum | Maxi-mum | Sample size | Median | Mini-mum |       | Maxi-mum |       |     |     |    |       |     |     |         |
| <b>Scenario GFDL-A2</b>  |             |        |          |           |             |        |           |          |             |           |          |          |             |        |          |           |             |        |           |          |             |           |          |          |             |        |          |       |          |       |     |     |    |       |     |     |         |
| <b>San Joaquin River</b> |             |        |          |           |             |        |           |          |             |           |          |          |             |        |          |           |             |        |           |          |             |           |          |          |             |        |          |       |          |       |     |     |    |       |     |     |         |
| Mossdale                 | 9           | 270.5  | 248      | 285       | 10          | 271.0  | 255       | 281      | 10          | 268.5     | 254      | 284      | 10          | 278.0  | 251      | 282       | 10          | 279.0  | 271       | 286      | 10          | 273.5     | 263      | 290      | 10          | 281.0  | 261      | 288   | 10       | 283.5 | 272 | 293 | 10 | 289.5 | 284 | 302 | 2.23**  |
| Burns Cut                | 9           | 277.0  | 261      | 290       | 10          | 279.0  | 259       | 287      | 10          | 277.0     | 259      | 289      | 10          | 283.5  | 260      | 289       | 10          | 285.0  | 280       | 292      | 10          | 284.5     | 273      | 294      | 10          | 286.5  | 273      | 299   | 10       | 291.0 | 282 | 296 | 10 | 295.5 | 288 | 303 | 2.17*** |
| Prisoners Point          | 9           | 260.5  | 224      | 280       | 10          | 256.5  | 236       | 278      | 10          | 251.5     | 234      | 265      | 10          | 263.0  | 248      | 280       | 10          | 270.5  | 254       | 281      | 10          | 269.5     | 260      | 286      | 10          | 275.5  | 258      | 287   | 10       | 280.5 | 262 | 287 | 10 | 284.0 | 274 | 301 | 3.68**  |
| Jersey Point             | 9           | 264.0  | 217      | 278       | 10          | 264.0  | 251       | 285      | 10          | 260.5     | 240      | 279      | 10          | 268.5  | 251      | 281       | 10          | 277.5  | 258       | 286      | 10          | 276.0     | 265      | 291      | 10          | 281.5  | 261      | 288   | 10       | 288.0 | 278 | 295 | 10 | 290.5 | 287 | 303 | 3.79**  |
| Antioch                  | 9           | 261.0  | 217      | 282       | 10          | 257.0  | 236       | 279      | 10          | 251.5     | 234      | 277      | 10          | 263.5  | 248      | 280       | 10          | 275.0  | 254       | 282      | 10          | 270.5     | 261      | 288      | 10          | 278.5  | 258      | 288   | 10       | 281.5 | 266 | 290 | 10 | 286.0 | 279 | 302 | 3.91**  |
| <b>Sacramento River</b>  |             |        |          |           |             |        |           |          |             |           |          |          |             |        |          |           |             |        |           |          |             |           |          |          |             |        |          |       |          |       |     |     |    |       |     |     |         |
| Hood                     | 9           | 232.5  | 207      | 262       | 10          | 249.5  | 216       | 276      | 10          | 236.0     | 216      | 251      | 10          | 248.0  | 229      | 266       | 10          | 255.0  | 244       | 270      | 10          | 260.5     | 240      | 274      | 10          | 266.5  | 231      | 285   | 10       | 277.5 | 259 | 285 | 10 | 280.0 | 258 | 300 | 5.79*** |
| Rio Vista                | 9           | 252.5  | 215      | 280       | 10          | 251.0  | 226       | 277      | 10          | 248.0     | 231      | 263      | 10          | 256.0  | 230      | 278       | 10          | 270.0  | 250       | 276      | 10          | 266.0     | 249      | 285      | 10          | 269.0  | 252      | 287   | 10       | 280.5 | 261 | 287 | 10 | 284.0 | 274 | 301 | 4.44*** |
| Decker Island            | 9           | 246.5  | 215      | 270       | 10          | 253.0  | 235       | 281      | 10          | 251.5     | 235      | 265      | 10          | 254.5  | 248      | 277       | 10          | 276.0  | 255       | 283      | 10          | 271.5     | 261      | 288      | 10          | 278.5  | 258      | 288   | 10       | 283.5 | 268 | 293 | 10 | 287.5 | 281 | 302 | 5.44*** |
| <b>North Delta</b>       |             |        |          |           |             |        |           |          |             |           |          |          |             |        |          |           |             |        |           |          |             |           |          |          |             |        |          |       |          |       |     |     |    |       |     |     |         |
| Upper Cache Slough       | 8           | 215.0  | 207      | 260       | 8           | 222.5  | 207       | 276      | 9           | 227.0     | 198      | 248      | 10          | 225.5  | 210      | 258       | 10          | 248.5  | 229       | 262      | 10          | 242.0     | 218      | 271      | 10          | 257.0  | 226      | 278   | 10       | 272.0 | 246 | 279 | 10 | 280.0 | 253 | 299 | 8.10*** |
| Miners Slough            | 8           | 216.0  | 210      | 260       | 9           | 222.0  | 214       | 259      | 10          | 227.0     | 199      | 249      | 10          | 227.5  | 216      | 256       | 10          | 251.0  | 230       | 263      | 10          | 242.5     | 222      | 272      | 10          | 257.5  | 227      | 277   | 10       | 272.5 | 248 | 279 | 10 | 279.0 | 254 | 282 | 7.99*** |
| Liberty Island           | 9           | 252.5  | 208      | 273       | 10          | 253.0  | 217       | 281      | 10          | 249.5     | 228      | 264      | 10          | 253.0  | 229      | 280       | 10          | 270.5  | 250       | 282      | 10          | 269.0     | 259      | 288      | 10          | 275.0  | 256      | 287   | 10       | 280.5 | 261 | 289 | 10 | 284.5 | 274 | 301 | 4.63**  |
| Deepwater Ship Channel   | 8           | 221.0  | 212      | 261       | 10          | 241.0  | 215       | 276      | 10          | 230.5     | 214      | 250      | 10          | 231.0  | 224      | 266       | 10          | 252.0  | 241       | 269      | 10          | 250.0     | 239      | 274      | 10          | 260.0  | 228      | 279   | 10       | 273.5 | 249 | 285 | 10 | 282.0 | 255 | 299 | 6.99**  |
| Lower Cache Slough       | 8           | 217.0  | 211      | 261       | 10          | 234.0  | 214       | 276      | 10          | 229.5     | 200      | 250      | 10          | 228.0  | 217      | 265       | 10          | 252.0  | 239       | 269      | 10          | 243.5     | 222      | 274      | 10          | 258.5  | 227      | 279   | 10       | 273.5 | 248 | 285 | 10 | 282.0 | 254 | 300 | 7.53**  |
| <b>Confluence</b>        |             |        |          |           |             |        |           |          |             |           |          |          |             |        |          |           |             |        |           |          |             |           |          |          |             |        |          |       |          |       |     |     |    |       |     |     |         |
| Mallard Island           | 8           | 226.0  | 216      | 262       | 10          | 235.5  | 215       | 276      | 10          | 229.0     | 213      | 251      | 10          | 236.0  | 228      | 266       | 10          | 254.0  | 243       | 270      | 10          | 257.0     | 239      | 274      | 10          | 265.5  | 230      | 286   | 10       | 277.5 | 249 | 285 | 10 | 280.0 | 257 | 300 | 7.27*** |
| <b>Suisun Bay</b>        |             |        |          |           |             |        |           |          |             |           |          |          |             |        |          |           |             |        |           |          |             |           |          |          |             |        |          |       |          |       |     |     |    |       |     |     |         |
| Martinez                 | 4           | 211.5  | 198      | 236       | 4           | 210.5  | 187       | 258      | 8           | 224.0     | 197      | 227      | 9           | 226.0  | 206      | 255       | 9           | 240.0  | 215       | 262      | 10          | 231.0     | 211      | 270      | 10          | 254.0  | 226      | 278   | 10       | 268.5 | 247 | 282 | 10 | 273.5 | 253 | 281 | 8.12**  |
| <b>Scenario GFDL-B1</b>  |             |        |          |           |             |        |           |          |             |           |          |          |             |        |          |           |             |        |           |          |             |           |          |          |             |        |          |       |          |       |     |     |    |       |     |     |         |
| <b>San Joaquin River</b> |             |        |          |           |             |        |           |          |             |           |          |          |             |        |          |           |             |        |           |          |             |           |          |          |             |        |          |       |          |       |     |     |    |       |     |     |         |
| Mossdale                 | 9           | 261.0  | 250      | 289       | 10          | 266.0  | 243       | 277      | 10          | 271.5     | 243      | 285      | 10          | 274.0  | 260      | 288       | 10          | 274.0  | 260       | 285      | 10          | 277.0     | 267      | 292      | 10          | 272.0  | 265      | 285   | 10       | 274.5 | 267 | 289 | 10 | 277.0 | 257 | 286 | 1.56**  |
| Burns Cut                | 9           | 267.0  | 258      | 293       | 10          | 275.5  | 266       | 281      | 10          | 280.0     | 255      | 286      | 10          | 279.0  | 269      | 289       | 10          | 277.5  | 275       | 288      | 10          | 281.5     | 273      | 297      | 10          | 277.5  | 273      | 287   | 10       | 282.0 | 275 | 293 | 10 | 283.0 | 268 | 291 | 1.35*   |
| Prisoners Point          | 9           | 252.5  | 229      | 272       | 10          | 250.5  | 236       | 274      | 10          | 255.0     | 241      | 270      | 10          | 260.5  | 232      | 277       | 10          | 260.5  | 247       | 274      | 10          | 265.0     | 241      | 277      | 10          | 267.5  | 251      | 273   | 10       | 267.0 | 258 | 284 | 10 | 261.0 | 252 | 272 | 1.88**  |
| Jersey Point             | 9           | 253.5  | 231      | 288       | 10          | 261.5  | 242       | 275      | 10          | 259.0     | 236      | 277      | 10          | 265.0  | 256      | 284       | 10          | 269.5  | 251       | 284      | 10          | 271.0     | 242      | 292      | 10          | 274.0  | 257      | 285   | 10       | 274.0 | 265 | 289 | 10 | 270.5 | 259 | 279 | 2.36**  |
| Antioch                  | 9           | 252.0  | 228      | 276       | 10          | 250.5  | 223       | 274      | 10          | 255.0     | 241      | 274      | 10          | 262.0  | 232      | 278       | 10          | 260.0  | 241       | 275      | 10          | 266.0     | 241      | 288      | 10          | 269.0  | 252      | 275   | 10       | 268.0 | 259 | 286 | 10 | 263.0 | 252 | 273 | 2.14**  |
| <b>Sacramento River</b>  |             |        |          |           |             |        |           |          |             |           |          |          |             |        |          |           |             |        |           |          |             |           |          |          |             |        |          |       |          |       |     |     |    |       |     |     |         |
| Hood                     | 9           | 234.5  | 211      | 267       | 10          | 233.0  | 217       | 249      | 9           | 251.0     | 235      | 260      | 10          | 251.5  | 223      | 276       | 10          | 246.0  | 223       | 267      | 10          | 256.0     | 222      | 272      | 10          | 261.5  | 230      | 270   | 10       | 256.0 | 246 | 274 | 10 | 256.5 | 249 | 264 | 3.04**  |
| Rio Vista                | 9           | 238.5  | 212      | 272       | 10          | 238.5  | 220       | 269      | 10          | 254.0     | 238      | 262      | 10          | 256.0  | 229      | 277       | 10          | 256.0  | 233       | 268      | 10          | 261.0     | 238      | 276      | 10          | 265.5  | 251      | 272   | 10       | 264.5 | 257 | 283 | 10 | 260.0 | 251 | 266 | 3.20**  |
| Decker Island            | 9           | 246.5  | 215      | 276       | 10          | 247.0  | 221       | 274      | 9           | 256.0     | 242      | 274      | 10          | 259.0  | 232      | 280       | 10          | 257.5  | 241       | 277      | 10          | 263.5     | 239      | 289      | 10          | 271.0  | 254      | 277   | 10       | 268.0 | 261 | 285 | 10 | 265.0 | 253 | 274 | 2.86**  |
| <b>North Delta</b>       |             |        |          |           |             |        |           |          |             |           |          |          |             |        |          |           |             |        |           |          |             |           |          |          |             |        |          |       |          |       |     |     |    |       |     |     |         |
| Upper Cache Slough       | 9           | 217.5  | 193      | 260       | 7           | 213.0  | 196       | 250      | 7           | 241.0     | 230      | 258      | 10          | 245.5  | 215      | 258       | 8           | 233.0  | 208       | 259      | 9           | 252.0     | 216      | 267      | 10          | 252.0  | 171      | 266   | 10       | 248.5 | 200 | 272 | 9  | 253.0 | 239 | 264 | 4.62**  |
| Miners Slough            | 9           | 217.5  | 195      | 260       | 9           | 214.0  | 198       | 250      | 8           | 237.5     | 211      | 258      | 10          | 242.5  | 217      | 259       | 9           | 231.0  | 206       | 259      | 9           | 254.0     | 219      | 267      | 10          | 252.0  | 220      | 267   | 10       | 248.5 | 201 | 272 | 9  | 255.0 | 241 | 263 | 4.90**  |
| Liberty Island           | 9           | 237.0  | 211      | 272       | 10          | 244.5  | 217       | 274      | 10          | 254.0     | 180      | 270      | 10          | 259.5  | 224      | 278       | 10          | 256.0  | 232       | 275      | 10          | 259.5     | 238      | 277      | 10          | 270.0  | 251      | 275   | 10       | 266.0 | 259 | 285 | 10 | 259.5 | 250 | 272 | 2.58*   |
| Deepwater Ship Channel   | 9           | 224.5  | 198      | 262       | 9           | 215.0  | 198       | 251      | 8           | 250.5     | 214      | 259      | 10          | 250.0  | 218      | 275       | 10          | 238.5  | 222       | 267      | 10          | 254.0     | 220      | 268      | 10          | 261.5  | 229      | 272   | 10       | 250.5 | 224 | 273 | 10 | 255.0 | 246 | 264 | 4.24*   |
| Lower Cache Slough       | 9           | 224.5  | 195      | 261       | 9           | 214.0  | 198       | 251      | 8           | 245.0     | 213      | 259      | 10          | 249.5  | 217      | 275       | 10          | 235.0  | 207       | 267      | 9           | 254.0     | 242      | 268      | 10          | 261.0  | 220      | 272   | 10       | 250.0 | 223 | 273 | 10 | 254.0 | 246 | 264 | 4.38*   |
| <b>Confluence</b>        |             |        |          |           |             |        |           |          |             |           |          |          |             |        |          |           |             |        |           |          |             |           |          |          |             |        |          |       |          |       |     |     |    |       |     |     |         |
| Mallard Island           | 9           | 233.5  | 197      | 262       | 9           | 215.0  | 199       | 248      | 8           | 251.0     | 213      | 260      | 10          | 250.0  | 221      | 275       | 10          | 244.5  | 210       | 267      | 10          | 255.0     | 220      | 272      | 10          | 261.0  | 229      | 270   | 10       | 251.0 | 225 | 274 | 10 | 256.0 | 247 | 264 | 3.72*   |
| <b>Suisun Bay</b>        |             |        |          |           |             |        |           |          |             |           |          |          |             |        |          |           |             |        |           |          |             |           |          |          |             |        |          |       |          |       |     |     |    |       |     |     |         |
| Martinez                 | 2           | 227.0  | 217      | 249       | 5           | 213.5  | 195       | 245      | 6           | 220.0     | 209      | 248      | 9           | 243.0  | 215      | 251       | 7           | 220.0  | 192       | 257      | 8           | 250.0     | 206      | 265      | 8           | 255.0  | 221      | 265   | 9        | 244.0 | 198 | 270 | 9  | 241.0 | 214 | 257 | NS      |
| <b>Scenario PCM-A2</b>   |             |        |          |           |             |        |           |          |             |           |          |          |             |        |          |           |             |        |           |          |             |           |          |          |             |        |          |       |          |       |     |     |    |       |     |     |         |
| <b>San Joaquin River</b> |             |        |          |           |             |        |           |          |             |           |          |          |             |        |          |           |             |        |           |          |             |           |          |          |             |        |          |       |          |       |     |     |    |       |     |     |         |
| Mossdale                 | 9           | 268.5  | 245      | 282       | 10          | 262.5  | 252       | 277      | 10          | 276.0     | 262      | 285      | 10          | 273.0  | 254      | 294       | 10          | 276.5  | 253       | 289      | 10          | 270.0     | 263      | 287      | 10          | 277.0  | 267      | 289   | 10       | 280.0 | 266 | 295 | 10 | 287.5 | 264 | 308 | 2.13**  |
| Burns Cut                | 9           | 273.5  | 257      | 285       | 10          | 275.0  | 258       | 289      | 10          | 279.5     | 270      | 290      | 10          | 280.0  | 258      | 298       | 10          | 282.0  | 270       | 295      | 10          | 283.0     | 271      | 29       |             |        |          |       |          |       |     |     |    |       |     |     |         |

|                          |   |       |     |     |    |       |     |     |    |       |     |     |    |       |     |     |    |       |     |     |    |       |     |     |    |       |     |     |    |       |     |     |    |       |     |     |         |
|--------------------------|---|-------|-----|-----|----|-------|-----|-----|----|-------|-----|-----|----|-------|-----|-----|----|-------|-----|-----|----|-------|-----|-----|----|-------|-----|-----|----|-------|-----|-----|----|-------|-----|-----|---------|
| Lower Cache Slough       | 4 | 204.0 | 196 | 223 | 10 | 226.0 | 173 | 259 | 9  | 223.0 | 221 | 254 | 10 | 226.5 | 208 | 263 | 10 | 238.0 | 196 | 283 | 10 | 236.5 | 228 | 261 | 10 | 256.5 | 232 | 275 | 10 | 241.0 | 227 | 274 | 10 | 260.5 | 251 | 291 | 5.80**  |
| <b>Confluence</b>        |   |       |     |     |    |       |     |     |    |       |     |     |    |       |     |     |    |       |     |     |    |       |     |     |    |       |     |     |    |       |     |     |    |       |     |     |         |
| Mallard Island           | 6 | 220.5 | 196 | 254 | 9  | 226.0 | 173 | 259 | 10 | 227.0 | 222 | 256 | 10 | 227.0 | 218 | 264 | 10 | 248.0 | 225 | 283 | 9  | 237.0 | 230 | 268 | 10 | 256.5 | 235 | 270 | 10 | 249.0 | 235 | 277 | 10 | 267.5 | 252 | 292 | 5.43*** |
| <b>Suisun Bay</b>        |   |       |     |     |    |       |     |     |    |       |     |     |    |       |     |     |    |       |     |     |    |       |     |     |    |       |     |     |    |       |     |     |    |       |     |     |         |
| Martinez                 | 1 | 220.0 | 220 | 220 | 2  | 219.5 | 216 | 223 | 0  | NV    | NV  | NV  | 4  | 229.0 | 210 | 260 | 7  | 221.0 | 201 | 233 | 8  | 226.0 | 215 | 249 | 9  | 224.0 | 214 | 263 | 10 | 225.5 | 217 | 267 | 10 | 248.5 | 225 | 287 | NS      |
| <b>Scenario PCM-B1</b>   |   |       |     |     |    |       |     |     |    |       |     |     |    |       |     |     |    |       |     |     |    |       |     |     |    |       |     |     |    |       |     |     |    |       |     |     |         |
| <b>San Joaquin River</b> |   |       |     |     |    |       |     |     |    |       |     |     |    |       |     |     |    |       |     |     |    |       |     |     |    |       |     |     |    |       |     |     |    |       |     |     |         |
| Mossdale                 | 9 | 268.0 | 254 | 300 | 10 | 275.5 | 256 | 285 | 10 | 266.0 | 254 | 293 | 10 | 269.5 | 246 | 287 | 10 | 273.0 | 255 | 287 | 10 | 272.5 | 256 | 289 | 10 | 270.0 | 259 | 291 | 10 | 274.0 | 255 | 288 | 10 | 272.0 | 257 | 289 | NS      |
| Burns Cut                | 9 | 275.0 | 259 | 302 | 10 | 280.5 | 265 | 287 | 10 | 278.0 | 263 | 297 | 10 | 277.5 | 264 | 290 | 10 | 276.5 | 261 | 293 | 10 | 280.0 | 265 | 290 | 10 | 281.5 | 270 | 295 | 10 | 288.5 | 262 | 296 | 10 | 278.5 | 268 | 292 | NS      |
| Prisoners Point          | 9 | 247.5 | 205 | 269 | 10 | 251.0 | 227 | 274 | 10 | 253.5 | 237 | 270 | 10 | 253.5 | 242 | 277 | 10 | 260.0 | 231 | 275 | 10 | 255.5 | 231 | 283 | 10 | 259.5 | 244 | 289 | 10 | 262.0 | 237 | 286 | 10 | 258.0 | 241 | 275 | 1.48**  |
| Jersey Point             | 9 | 255.0 | 204 | 275 | 10 | 259.0 | 236 | 277 | 10 | 259.5 | 252 | 292 | 10 | 254.0 | 245 | 283 | 10 | 265.5 | 235 | 286 | 10 | 265.5 | 234 | 287 | 10 | 266.5 | 249 | 292 | 10 | 270.5 | 239 | 289 | 10 | 263.5 | 256 | 278 | 1.56*   |
| Antioch                  | 9 | 246.0 | 200 | 269 | 10 | 251.5 | 227 | 275 | 10 | 256.0 | 236 | 291 | 10 | 253.5 | 242 | 278 | 10 | 263.0 | 230 | 279 | 10 | 256.5 | 231 | 284 | 10 | 261.5 | 244 | 291 | 10 | 263.0 | 232 | 287 | 10 | 259.5 | 241 | 276 | 1.71*   |
| <b>Sacramento River</b>  |   |       |     |     |    |       |     |     |    |       |     |     |    |       |     |     |    |       |     |     |    |       |     |     |    |       |     |     |    |       |     |     |    |       |     |     |         |
| Hood                     | 8 | 223.0 | 210 | 235 | 10 | 223.0 | 212 | 249 | 10 | 230.0 | 216 | 267 | 10 | 230.0 | 202 | 264 | 10 | 236.0 | 223 | 271 | 10 | 246.5 | 227 | 280 | 10 | 255.5 | 228 | 284 | 10 | 253.5 | 221 | 276 | 10 | 242.5 | 224 | 274 | 3.95**  |
| Rio Vista                | 9 | 233.5 | 196 | 250 | 10 | 248.5 | 225 | 273 | 10 | 246.0 | 223 | 269 | 10 | 243.5 | 229 | 276 | 10 | 246.5 | 226 | 275 | 10 | 252.5 | 229 | 283 | 10 | 257.0 | 232 | 289 | 10 | 262.0 | 226 | 286 | 10 | 255.5 | 240 | 275 | 2.66**  |
| Decker Island            | 8 | 236.0 | 217 | 252 | 10 | 247.5 | 222 | 273 | 10 | 250.0 | 224 | 277 | 10 | 247.0 | 230 | 276 | 10 | 256.5 | 230 | 277 | 10 | 256.0 | 231 | 284 | 10 | 258.5 | 243 | 292 | 10 | 264.5 | 230 | 288 | 10 | 257.0 | 242 | 277 | 2.68**  |
| <b>North Delta</b>       |   |       |     |     |    |       |     |     |    |       |     |     |    |       |     |     |    |       |     |     |    |       |     |     |    |       |     |     |    |       |     |     |    |       |     |     |         |
| Upper Cache Slough       | 3 | 206.0 | 205 | 227 | 4  | 214.5 | 200 | 233 | 4  | 227.0 | 202 | 264 | 5  | 216.5 | 197 | 262 | 10 | 229.0 | 196 | 269 | 8  | 238.0 | 222 | 280 | 9  | 250.0 | 215 | 281 | 9  | 235.0 | 210 | 266 | 10 | 226.0 | 195 | 273 | 3.48*   |
| Miners Slough            | 7 | 218.0 | 197 | 230 | 8  | 212.5 | 198 | 236 | 8  | 212.0 | 198 | 250 | 8  | 222.0 | 196 | 262 | 10 | 229.5 | 205 | 268 | 10 | 226.5 | 201 | 264 | 9  | 250.0 | 221 | 279 | 10 | 235.5 | 195 | 266 | 10 | 226.5 | 215 | 272 | 3.06*   |
| Liberty Island           | 8 | 235.0 | 213 | 256 | 10 | 246.5 | 224 | 274 | 10 | 250.0 | 226 | 291 | 10 | 243.5 | 229 | 277 | 10 | 250.0 | 225 | 275 | 10 | 254.0 | 228 | 284 | 10 | 258.0 | 230 | 290 | 10 | 262.5 | 225 | 287 | 10 | 254.5 | 239 | 275 | 1.75*   |
| Deepwater Ship Channel   | 7 | 221.5 | 199 | 234 | 9  | 219.0 | 211 | 237 | 9  | 222.0 | 204 | 265 | 9  | 226.5 | 200 | 263 | 10 | 232.0 | 208 | 270 | 10 | 232.5 | 223 | 280 | 10 | 251.5 | 226 | 282 | 10 | 252.0 | 216 | 274 | 10 | 233.0 | 217 | 274 | 3.5**   |
| Lower Cache Slough       | 7 | 220.5 | 198 | 231 | 8  | 217.0 | 210 | 236 | 9  | 218.0 | 199 | 265 | 8  | 224.0 | 197 | 263 | 10 | 231.0 | 206 | 270 | 10 | 232.0 | 202 | 280 | 10 | 249.0 | 221 | 283 | 10 | 243.5 | 213 | 274 | 10 | 228.0 | 215 | 274 | 2.99*   |
| <b>Confluence</b>        |   |       |     |     |    |       |     |     |    |       |     |     |    |       |     |     |    |       |     |     |    |       |     |     |    |       |     |     |    |       |     |     |    |       |     |     |         |
| Mallard Island           | 7 | 220.5 | 199 | 234 | 8  | 220.0 | 210 | 237 | 9  | 219.0 | 199 | 266 | 8  | 233.0 | 196 | 264 | 10 | 227.5 | 208 | 270 | 10 | 235.0 | 223 | 280 | 10 | 253.0 | 227 | 284 | 10 | 252.5 | 216 | 274 | 10 | 235.0 | 217 | 274 | 3.76*   |
| <b>Suisun Bay</b>        |   |       |     |     |    |       |     |     |    |       |     |     |    |       |     |     |    |       |     |     |    |       |     |     |    |       |     |     |    |       |     |     |    |       |     |     |         |
| Martinez                 | 2 | 205.0 | 199 | 211 | 2  | 228.5 | 226 | 231 | 1  | 224.0 | 224 | 224 | 1  | 238.0 | 216 | 260 | 4  | 219.0 | 202 | 223 | 4  | 220.5 | 215 | 262 | 4  | 214.5 | 199 | 219 | 6  | 222.0 | 205 | 261 | 6  | 224.0 | 220 | 268 | NS      |
