# Supplementary material for: Coupled Downscaled Climate Models and Ecophysiological Metrics Forecast Habitat Compression for an Endangered Estuarine Fish
Source: PubMed Central journal article supplement (PMC4721863; doi:10.1371/journal.pone.0146724), 2016-01-21
Supplement: pone.0146724.s011.pdf [file pone.0146724.s011.pdf]

**S6 Table. Median, minimum, and maximum values for the number of days per year for the duration of the maturation window (last day of 24°C to beginning of the spawning window) during each decade from 2010-2099, for the adult life stage of Delta Smelt for the least-warming (PCM-B1), most-warming (GFDL-A2) and two intermediate (PCM-A2 and GFDL-B1) climate change scenarios.** The significance value for Trend is from the Mann-Kendal test (NS, P≥0.05; \*, P<0.05; \*\*, P<0.01; \*\*\*, P<0.001; NA, no non-zero values; NT, fewer than 3 values so trend not calculated) and the number is the slope of a regression of decadal medians.

|                          | 2010-2019   |        |          |          | 2020-2029   |        |          |          | 2030-2039   |        |          |          | 2040-2049   |        |          |          | 2050-2059   |        |          |          | 2060-2069   |        |          |          | 2070-2079   |        |          |          | 2080-2089   |        |          |          | 2090-2099   |        |          |          | Trend     |
|--------------------------|-------------|--------|----------|----------|-------------|--------|----------|----------|-------------|--------|----------|----------|-------------|--------|----------|----------|-------------|--------|----------|----------|-------------|--------|----------|----------|-------------|--------|----------|----------|-------------|--------|----------|----------|-------------|--------|----------|----------|-----------|
|                          | Sample size | Median | Mini-mum | Maxi-mum | Sample size | Median | Mini-mum | Maxi-mum | Sample size | Median | Mini-mum | Maxi-mum | Sample size | Median | Mini-mum | Maxi-mum | Sample size | Median | Mini-mum | Maxi-mum | Sample size | Median | Mini-mum | Maxi-mum | Sample size | Median | Mini-mum | Maxi-mum | Sample size | Median | Mini-mum | Maxi-mum | Sample size | Median | Mini-mum | Maxi-mum |           |
| <b>Scenario GFDL-A2</b>  |             |        |          |          |             |        |          |          |             |        |          |          |             |        |          |          |             |        |          |          |             |        |          |          |             |        |          |          |             |        |          |          |             |        |          |          |           |
| <b>San Joaquin River</b> |             |        |          |          |             |        |          |          |             |        |          |          |             |        |          |          |             |        |          |          |             |        |          |          |             |        |          |          |             |        |          |          |             |        |          |          |           |
| Mossdale                 | 9           | 175.0  | 145      | 195      | 10          | 171.5  | 147      | 199      | 10          | 179.5  | 160      | 193      | 10          | 176.5  | 137      | 191      | 10          | 156.5  | 144      | 181      | 10          | 160.5  | 143      | 180      | 10          | 149.5  | 140      | 180      | 10          | 133.5  | 110      | 160      | 10          | 136.0  | 120      | 145      | -5.77**   |
| Burns Cut                | 9           | 176.0  | 160      | 190      | 10          | 170.0  | 160      | 195      | 10          | 176.5  | 161      | 191      | 10          | 170.5  | 152      | 191      | 10          | 154.5  | 147      | 173      | 10          | 159.0  | 128      | 177      | 10          | 148.0  | 142      | 169      | 10          | 141.5  | 119      | 169      | 10          | 136.5  | 122      | 161      | -5.20**   |
| Prisoners Point          | 9           | 188.0  | 174      | 223      | 10          | 185.5  | 166      | 208      | 10          | 198.5  | 192      | 220      | 10          | 184.0  | 166      | 209      | 10          | 170.5  | 156      | 188      | 10          | 170.5  | 155      | 184      | 10          | 158.5  | 147      | 184      | 10          | 149.5  | 125      | 162      | 10          | 142.5  | 138      | 167      | -6.39***  |
| Jersey Point             | 9           | 193.0  | 176      | 259      | 10          | 195.5  | 180      | 207      | 10          | 198.5  | 174      | 220      | 10          | 191.0  | 167      | 214      | 10          | 173.0  | 155      | 199      | 10          | 170.5  | 124      | 192      | 10          | 153.5  | 141      | 186      | 10          | 148.5  | 126      | 169      | 10          | 144.0  | 135      | 169      | -7.46**   |
| Antioch                  | 9           | 194.0  | 173      | 232      | 10          | 189.0  | 168      | 209      | 10          | 203.5  | 175      | 221      | 10          | 186.5  | 168      | 211      | 10          | 165.5  | 154      | 188      | 10          | 172.0  | 153      | 185      | 10          | 155.0  | 146      | 191      | 10          | 148.5  | 122      | 169      | 10          | 143.5  | 124      | 175      | -7.25**   |
| <b>Sacramento River</b>  |             |        |          |          |             |        |          |          |             |        |          |          |             |        |          |          |             |        |          |          |             |        |          |          |             |        |          |          |             |        |          |          |             |        |          |          |           |
| Hood                     | 9           | 237.0  | 198      | 260      | 10          | 222.0  | 192      | 250      | 10          | 229.5  | 210      | 256      | 10          | 215.0  | 196      | 246      | 10          | 202.5  | 183      | 222      | 10          | 197.0  | 168      | 224      | 10          | 183.5  | 152      | 222      | 10          | 169.5  | 158      | 196      | 10          | 160.0  | 145      | 186      | -9.59***  |
| Rio Vista                | 9           | 225.0  | 185      | 237      | 10          | 209.0  | 188      | 237      | 10          | 219.0  | 205      | 232      | 10          | 207.5  | 190      | 228      | 10          | 190.5  | 169      | 218      | 10          | 188.5  | 160      | 206      | 10          | 177.0  | 150      | 204      | 10          | 161.5  | 152      | 195      | 10          | 157.5  | 140      | 179      | -8.59***  |
| Decker Island            | 9           | 216.0  | 187      | 263      | 10          | 209.5  | 185      | 229      | 10          | 213.5  | 201      | 239      | 10          | 208.5  | 187      | 226      | 10          | 184.5  | 160      | 205      | 10          | 184.5  | 130      | 208      | 10          | 162.5  | 154      | 189      | 10          | 162.0  | 128      | 182      | 10          | 155.0  | 139      | 171      | -8.54***  |
| <b>North Delta</b>       |             |        |          |          |             |        |          |          |             |        |          |          |             |        |          |          |             |        |          |          |             |        |          |          |             |        |          |          |             |        |          |          |             |        |          |          |           |
| Upper Cache Slough       | 8           | 239.0  | 201      | 269      | 8           | 227.5  | 194      | 253      | 9           | 236.0  | 210      | 260      | 10          | 229.0  | 197      | 266      | 10          | 199.5  | 178      | 234      | 10          | 199.0  | 167      | 240      | 10          | 175.0  | 153      | 200      | 10          | 165.5  | 132      | 193      | 10          | 161.5  | 134      | 180      | -10.8***  |
| Miners Slough            | 8           | 240.0  | 202      | 266      | 9           | 230.0  | 195      | 256      | 10          | 232.0  | 210      | 253      | 10          | 226.5  | 198      | 265      | 10          | 205.0  | 178      | 233      | 10          | 196.0  | 169      | 236      | 10          | 181.0  | 156      | 209      | 10          | 171.0  | 133      | 193      | 10          | 163.0  | 142      | 180      | -10.29*** |
| Liberty Island           | 9           | 215.0  | 178      | 263      | 10          | 213.5  | 189      | 233      | 10          | 212.5  | 201      | 233      | 10          | 200.5  | 191      | 233      | 10          | 189.0  | 160      | 206      | 10          | 181.0  | 127      | 210      | 10          | 163.0  | 146      | 191      | 10          | 159.5  | 131      | 188      | 10          | 152.5  | 141      | 176      | -9.48***  |
| Deepwater Ship Chann     | 8           | 225.5  | 200      | 264      | 10          | 218.5  | 193      | 231      | 10          | 221.0  | 205      | 249      | 10          | 219.5  | 189      | 250      | 10          | 195.0  | 174      | 229      | 10          | 188.5  | 165      | 216      | 10          | 172.5  | 151      | 198      | 10          | 153.0  | 128      | 179      | 10          | 159.0  | 127      | 179      | -9.84**   |
| Lower Cache Slough       | 8           | 237.0  | 201      | 265      | 10          | 224.0  | 193      | 249      | 10          | 226.0  | 205      | 251      | 10          | 226.0  | 190      | 264      | 10          | 195.5  | 174      | 232      | 10          | 194.0  | 166      | 235      | 10          | 173.5  | 151      | 200      | 10          | 153.5  | 128      | 191      | 10          | 159.5  | 126      | 180      | -10.98**  |
| <b>Confluence</b>        |             |        |          |          |             |        |          |          |             |        |          |          |             |        |          |          |             |        |          |          |             |        |          |          |             |        |          |          |             |        |          |          |             |        |          |          |           |
| Mallard Island           | 8           | 231.5  | 195      | 261      | 10          | 221.5  | 191      | 252      | 10          | 231.5  | 210      | 255      | 10          | 224.0  | 196      | 247      | 10          | 198.5  | 171      | 222      | 10          | 189.5  | 160      | 217      | 10          | 180.5  | 150      | 221      | 10          | 165.5  | 147      | 200      | 10          | 157.5  | 142      | 180      | -10.01*** |
| <b>Suisun Bay</b>        |             |        |          |          |             |        |          |          |             |        |          |          |             |        |          |          |             |        |          |          |             |        |          |          |             |        |          |          |             |        |          |          |             |        |          |          |           |
| Martinez                 | 4           | 257.0  | 223      | 267      | 4           | 253.0  | 200      | 281      | 8           | 246.5  | 233      | 271      | 9           | 238.0  | 203      | 257      | 9           | 208.0  | 180      | 253      | 10          | 218.5  | 174      | 241      | 10          | 190.0  | 175      | 226      | 10          | 174.0  | 159      | 203      | 10          | 172.0  | 144      | 190      | -11.83*** |
| <b>Scenario GFDL-B1</b>  |             |        |          |          |             |        |          |          |             |        |          |          |             |        |          |          |             |        |          |          |             |        |          |          |             |        |          |          |             |        |          |          |             |        |          |          |           |
| <b>San Joaquin River</b> |             |        |          |          |             |        |          |          |             |        |          |          |             |        |          |          |             |        |          |          |             |        |          |          |             |        |          |          |             |        |          |          |             |        |          |          |           |
| Mossdale                 | 9           | 195.0  | 169      | 206      | 10          | 178.5  | 166      | 221      | 10          | 166.5  | 127      | 217      | 10          | 164.0  | 155      | 182      | 10          | 165.5  | 143      | 187      | 10          | 164.5  | 126      | 185      | 10          | 157.5  | 133      | 198      | 10          | 160.5  | 141      | 193      | 10          | 155.0  | 133      | 176      | -3.68**   |
| Burns Cut                | 9           | 188.0  | 165      | 197      | 10          | 180.0  | 170      | 202      | 10          | 169.5  | 149      | 205      | 10          | 164.5  | 154      | 179      | 10          | 168.5  | 146      | 184      | 10          | 157.5  | 148      | 173      | 10          | 172.5  | 143      | 187      | 10          | 158.0  | 147      | 183      | 10          | 161.0  | 141      | 181      | -2.92**   |
| Prisoners Point          | 9           | 204.0  | 176      | 221      | 10          | 202.5  | 174      | 225      | 10          | 187.0  | 163      | 223      | 10          | 186.5  | 167      | 206      | 10          | 186.0  | 176      | 210      | 10          | 174.5  | 159      | 199      | 10          | 177.5  | 153      | 200      | 10          | 166.5  | 160      | 195      | 10          | 181.0  | 163      | 207      | -3.85**   |
| Jersey Point             | 9           | 215.0  | 181      | 220      | 10          | 201.5  | 183      | 227      | 10          | 194.0  | 156      | 218      | 10          | 185.5  | 173      | 204      | 10          | 185.0  | 162      | 225      | 10          | 183.5  | 151      | 212      | 10          | 179.5  | 156      | 209      | 10          | 175.0  | 145      | 198      | 10          | 183.0  | 158      | 200      | -3.98***  |
| Antioch                  | 9           | 207.0  | 177      | 226      | 10          | 208.5  | 177      | 229      | 10          | 190.0  | 152      | 237      | 10          | 187.0  | 168      | 209      | 10          | 192.5  | 179      | 216      | 10          | 174.5  | 159      | 200      | 10          | 178.5  | 151      | 204      | 10          | 168.5  | 161      | 196      | 10          | 183.5  | 160      | 210      | -4.16*    |
| <b>Sacramento River</b>  |             |        |          |          |             |        |          |          |             |        |          |          |             |        |          |          |             |        |          |          |             |        |          |          |             |        |          |          |             |        |          |          |             |        |          |          |           |
| Hood                     | 9           | 230.0  | 199      | 256      | 10          | 235.5  | 206      | 256      | 9           | 208.0  | 176      | 228      | 10          | 210.0  | 185      | 234      | 10          | 215.0  | 198      | 244      | 10          | 203.5  | 185      | 223      | 10          | 196.0  | 161      | 232      | 10          | 201.5  | 174      | 215      | 10          | 201.5  | 184      | 217      | -4.11*    |
| Rio Vista                | 9           | 230.0  | 194      | 252      | 10          | 228.5  | 186      | 253      | 10          | 205.5  | 174      | 243      | 10          | 205.5  | 184      | 227      | 10          | 214.0  | 192      | 234      | 10          | 194.0  | 183      | 208      | 10          | 188.0  | 160      | 208      | 10          | 187.5  | 169      | 204      | 10          | 198.5  | 180      | 216      | -4.93**   |
| Decker Island            | 9           | 225.0  | 195      | 259      | 10          | 224.5  | 187      | 249      | 9           | 204.0  | 167      | 222      | 10          | 206.5  | 178      | 241      | 10          | 207.0  | 174      | 232      | 10          | 191.5  | 173      | 224      | 10          | 188.5  | 164      | 214      | 10          | 189.0  | 164      | 205      | 10          | 194.5  | 179      | 209      | -4.58*    |
| <b>North Delta</b>       |             |        |          |          |             |        |          |          |             |        |          |          |             |        |          |          |             |        |          |          |             |        |          |          |             |        |          |          |             |        |          |          |             |        |          |          |           |
| Upper Cache Slough       | 9           | 251.0  | 209      | 279      | 7           | 245.0  | 193      | 275      | 7           | 203.0  | 147      | 232      | 10          | 204.5  | 185      | 248      | 8           | 225.0  | 182      | 247      | 9           | 200.0  | 174      | 235      | 10          | 208.0  | 162      | 273      | 10          | 202.0  | 151      | 232      | 9           | 197.0  | 156      | 209      | -5.66*    |
| Miners Slough            | 9           | 250.0  | 210      | 277      | 9           | 244.0  | 212      | 277      | 8           | 216.0  | 172      | 240      | 10          | 219.0  | 186      | 246      | 9           | 233.0  | 183      | 245      | 9           | 202.0  | 175      | 232      | 10          | 205.5  | 162      | 230      | 10          | 202.5  | 167      | 231      | 9           | 199.0  | 185      | 212      | -6.11**   |
| Liberty Island           | 9           | 228.0  | 198      | 262      | 10          | 221.0  | 185      | 252      | 10          | 206.0  | 167      | 279      | 10          | 193.5  | 179      | 240      | 10          | 207.0  | 167      | 237      | 10          | 188.0  | 166      | 222      | 10          | 185.5  | 157      | 216      | 10          | 187.5  | 147      | 207      | 10          | 197.0  | 179      | 213      | -3.98**   |
| Deepwater Ship Chann     | 9           | 237.0  | 207      | 273      | 9           | 242.0  | 193      | 272      | 8           | 202.5  | 147      | 235      | 10          | 197.5  | 180      | 244      | 10          | 208.0  | 180      | 238      | 10          | 198.5  | 162      | 234      | 10          | 186.0  | 154      | 220      | 10          | 192.5  | 151      | 228      | 10          | 195.0  | 178      | 205      | -5.81*    |
| Lower Cache Slough       | 9           | 237.0  | 208      | 277      | 9           | 244.0  | 210      | 272      | 8           | 205.0  | 147      | 236      | 10          | 201.5  | 181      | 246      | 10          | 217.5  | 180      | 245      | 9           | 198.0  | 162      | 211      | 10          | 186.5  | 154      | 229      | 10          | 193.0  | 151      | 230      | 10          | 195.5  | 179      | 207      | -5.99**   |
| <b>Confluence</b>        |             |        |          |          |             |        |          |          |             |        |          |          |             |        |          |          |             |        |          |          |             |        |          |          |             |        |          |          |             |        |          |          |             |        |          |          |           |
| Mallard Island           | 9           | 233.0  | 204      | 265      | 9           | 257.0  | 206      | 267      | 8           | 206.5  | 175      | 244      | 10          | 203.5  | 185      | 233      | 10          | 215.5  | 198      | 253      | 10          | 192.0  | 185      | 224      | 10          | 190.0  | 160      | 232      | 10          | 200.0  | 166      | 236      | 10          | 200.5  | 182      | 217      | -5.76*    |
| <b>Suisun Bay</b>        |             |        |          |          |             |        |          |          |             |        |          |          |             |        |          |          |             |        |          |          |             |        |          |          |             |        |          |          |             |        |          |          |             |        |          |          |           |
| Martinez                 | 2           | 244.0  | 232      | 256      | 5           | 248.0  | 210      | 275      | 6           | 38.5   | 204      | 243      | 9           | 219.0  | 201      | 247      | 7           | 240.0  | 203      | 272      | 8           | 201.0  | 188      | 255      | 8           | 197.0  | 176      | 235      | 9           | 208.0  | 171      | 256      | 9           | 221.0  | 186      | 249      | NS        |
| <b>Scenario PCM-A2</b>   |             |        |          |          |             |        |          |          |             |        |          |          |             |        |          |          |             |        |          |          |             |        |          |          |             |        |          |          |             |        |          |          |             |        |          |          |           |
| <b>San Joaquin River</b> |             |        |          |          |             |        |          |          |             |        |          |          |             |        |          |          |             |        |          |          |             |        |          |          |             |        |          |          |             |        |          |          |             |        |          |          |           |
| Mossdale                 | 9           | 183.0  | 166      | 221      | 10          | 182.5  | 166      | 204      | 10          | 175.0  | 158      | 181      | 10          | 177.5  | 142      | 196      | 10          | 159.0  | 133      | 168      | 10          | 161.5  | 142      | 184      | 10          | 165.0  | 149      | 181      | 10          | 155.0  | 120      | 167      | 10          | 147.0  | 119      | 179      | -4.38**   |
| Burns Cut                | 9           | 180.0  | 176      | 211      | 10          | 176.5  | 162      | 193      | 10          | 174.0  | 157      | 189      | 10          | 171.0  | 142      | 194      | 10          | 162.0  | 146      | 180      | 10          | 160.5  | 142      | 182      | 10          | 163.0  | 148      | 177      | 10          | 153.5  | 131      | 169      | 10          | 147.5  | 140      | 176      | -3.86***  |
| Prisoners Point          | 9           | 223.0  | 169      | 234      | 10          | 194.0  | 181      | 210      | 10          | 198.0  | 185      | 218      | 10          | 191.5  | 176      | 218      | 10          | 187.0  | 157      | 200      | 10          | 180.5  | 160      | 192      | 10          | 180.0  | 156      | 198      | 10          | 164.5  | 140      | 190      | 10          | 159.5  | 149      | 184      | -6.49***  |
| Jersey Point             | 9           | 221.0  | 188      | 259      | 10          | 200.0  | 182      | 211      | 10          | 197.0  | 181      | 222      | 10          | 191.0  | 165      | 221      | 10          | 187.5  | 149      | 220      | 10          | 179.0  | 158      | 200      | 10          | 177.0  | 157      | 203      | 10          | 172.5  | 138      | 182      | 10          | 161.5  | 148      | 186      | -6.21***  |
| Antioch                  | 9           | 229.0  | 187      | 251      | 10          | 194.5  | 183      | 211      | 10          | 198.5  | 186      | 221      | 10          | 201.0  | 151      | 219      | 10          | 187.0  | 154      | 201      | 10          | 180.5  | 161      | 200      | 10          | 182.0  | 155      | 198      | 10          | 164.0  | 135      | 191      | 10          | 155.0  | 149      | 187      | -7.35**   |
| <b>Sacramento River</b>  |             |        |          |          |             |        |          |          |             |        |          |          |             |        |          |          |             |        |          |          |             |        |          |          |             |        |          |          |             |        |          |          |             |        |          |          |           |

|                          |   |       |     |     |    |       |     |     |    |       |     |     |    |       |     |     |    |       |     |     |    |       |     |     |    |       |     |     |    |       |     |     |    |       |     |     |          |
|--------------------------|---|-------|-----|-----|----|-------|-----|-----|----|-------|-----|-----|----|-------|-----|-----|----|-------|-----|-----|----|-------|-----|-----|----|-------|-----|-----|----|-------|-----|-----|----|-------|-----|-----|----------|
| Deepwater Ship Channel   | 5 | 233.0 | 228 | 273 | 10 | 223.5 | 184 | 289 | 10 | 227.5 | 201 | 235 | 10 | 230.5 | 190 | 254 | 10 | 197.5 | 156 | 237 | 10 | 201.5 | 165 | 255 | 10 | 188.5 | 169 | 229 | 10 | 194.5 | 162 | 217 | 10 | 176.0 | 161 | 198 | -7.03**  |
| Lower Cache Slough       | 4 | 258.5 | 229 | 276 | 10 | 225.5 | 184 | 291 | 9  | 230.0 | 203 | 237 | 10 | 232.5 | 191 | 265 | 10 | 205.5 | 157 | 239 | 10 | 212.5 | 166 | 258 | 10 | 192.5 | 175 | 236 | 10 | 205.5 | 163 | 227 | 10 | 188.5 | 160 | 199 | -7.25**  |
| <b>Confluence</b>        |   |       |     |     |    |       |     |     |    |       |     |     |    |       |     |     |    |       |     |     |    |       |     |     |    |       |     |     |    |       |     |     |    |       |     |     |          |
| Mallard Island           | 6 | 249.0 | 215 | 282 | 9  | 232.0 | 202 | 275 | 10 | 226.5 | 207 | 241 | 10 | 233.5 | 191 | 256 | 10 | 211.5 | 168 | 227 | 9  | 209.0 | 172 | 223 | 10 | 201.5 | 182 | 238 | 10 | 202.0 | 147 | 226 | 10 | 192.0 | 165 | 216 | -6.54**  |
| <b>Suisun Bay</b>        |   |       |     |     |    |       |     |     |    |       |     |     |    |       |     |     |    |       |     |     |    |       |     |     |    |       |     |     |    |       |     |     |    |       |     |     |          |
| Martinez                 | 1 | 237.0 | 237 | 237 | 2  | 242.0 | 239 | 245 | 0  | NV    | NV  | NV  | 4  | 217.0 | 196 | 265 | 7  | 236.0 | 217 | 256 | 8  | 221.5 | 195 | 232 | 9  | 231.0 | 191 | 258 | 10 | 222.0 | 178 | 238 | 10 | 211.5 | 172 | 228 | NS       |
| <b>Scenario PCM-B1</b>   |   |       |     |     |    |       |     |     |    |       |     |     |    |       |     |     |    |       |     |     |    |       |     |     |    |       |     |     |    |       |     |     |    |       |     |     |          |
| <b>San Joaquin River</b> |   |       |     |     |    |       |     |     |    |       |     |     |    |       |     |     |    |       |     |     |    |       |     |     |    |       |     |     |    |       |     |     |    |       |     |     |          |
| Mossdale                 | 9 | 183.0 | 145 | 197 | 10 | 178.5 | 167 | 194 | 10 | 180.5 | 150 | 196 | 10 | 183.0 | 156 | 202 | 10 | 176.0 | 151 | 188 | 10 | 174.5 | 161 | 208 | 10 | 165.0 | 141 | 189 | 10 | 169.0 | 149 | 194 | 10 | 171.5 | 145 | 185 | -1.90*   |
| Burns Cut                | 9 | 177.0 | 147 | 192 | 10 | 177.0 | 159 | 190 | 10 | 175.5 | 155 | 191 | 10 | 177.0 | 155 | 195 | 10 | 174.0 | 149 | 181 | 10 | 169.5 | 165 | 204 | 10 | 163.0 | 142 | 182 | 10 | 157.0 | 147 | 185 | 10 | 168.0 | 151 | 175 | -2.14**  |
| Prisoners Point          | 9 | 202.0 | 185 | 243 | 10 | 208.5 | 188 | 243 | 10 | 194.0 | 173 | 213 | 10 | 196.0 | 184 | 208 | 10 | 185.5 | 176 | 225 | 10 | 194.5 | 177 | 219 | 10 | 186.0 | 156 | 203 | 10 | 181.0 | 160 | 208 | 10 | 185.5 | 159 | 200 | -2.77*   |
| Jersey Point             | 9 | 211.0 | 178 | 262 | 10 | 206.5 | 182 | 226 | 10 | 192.5 | 165 | 218 | 10 | 198.5 | 166 | 232 | 10 | 189.5 | 179 | 233 | 10 | 197.0 | 165 | 223 | 10 | 177.0 | 163 | 209 | 10 | 175.5 | 153 | 215 | 10 | 189.0 | 165 | 197 | -3.56**  |
| Antioch                  | 9 | 203.0 | 188 | 255 | 10 | 212.0 | 194 | 245 | 10 | 188.0 | 168 | 228 | 10 | 198.0 | 185 | 215 | 10 | 186.0 | 162 | 230 | 10 | 198.5 | 178 | 222 | 10 | 180.0 | 155 | 205 | 10 | 183.5 | 157 | 211 | 10 | 185.5 | 159 | 203 | -2.85*   |
| <b>Sacramento River</b>  |   |       |     |     |    |       |     |     |    |       |     |     |    |       |     |     |    |       |     |     |    |       |     |     |    |       |     |     |    |       |     |     |    |       |     |     |          |
| Hood                     | 8 | 245.0 | 231 | 268 | 10 | 241.0 | 211 | 258 | 10 | 243.5 | 189 | 258 | 10 | 232.5 | 192 | 276 | 10 | 216.5 | 185 | 245 | 10 | 218.5 | 184 | 237 | 10 | 207.0 | 168 | 235 | 10 | 209.0 | 180 | 234 | 10 | 197.5 | 171 | 243 | -6.22**  |
| Rio Vista                | 9 | 234.0 | 202 | 267 | 10 | 225.5 | 206 | 255 | 10 | 207.0 | 187 | 248 | 10 | 220.0 | 190 | 237 | 10 | 209.0 | 184 | 243 | 10 | 211.0 | 181 | 230 | 10 | 201.0 | 163 | 227 | 10 | 204.5 | 166 | 227 | 10 | 189.5 | 167 | 217 | -4.37**  |
| Decker Island            | 8 | 235.5 | 218 | 243 | 10 | 233.5 | 203 | 261 | 10 | 214.5 | 179 | 246 | 10 | 213.5 | 174 | 252 | 10 | 208.5 | 184 | 244 | 10 | 206.0 | 172 | 235 | 10 | 205.5 | 167 | 218 | 10 | 193.0 | 175 | 229 | 10 | 200.0 | 168 | 218 | -4.82*** |
| <b>North Delta</b>       |   |       |     |     |    |       |     |     |    |       |     |     |    |       |     |     |    |       |     |     |    |       |     |     |    |       |     |     |    |       |     |     |    |       |     |     |          |
| Upper Cache Slough       | 3 | 264.0 | 236 | 276 | 4  | 243.0 | 226 | 264 | 4  | 230.5 | 189 | 265 | 5  | 245.0 | 178 | 257 | 10 | 233.5 | 183 | 272 | 8  | 220.5 | 170 | 231 | 9  | 213.0 | 167 | 242 | 9  | 216.0 | 178 | 251 | 10 | 220.0 | 169 | 265 | -5.28**  |
| Miners Slough            | 7 | 249.0 | 230 | 276 | 8  | 249.5 | 226 | 272 | 8  | 244.5 | 208 | 265 | 8  | 240.0 | 178 | 269 | 10 | 232.5 | 185 | 263 | 10 | 231.5 | 198 | 262 | 9  | 213.0 | 176 | 243 | 10 | 216.5 | 179 | 247 | 10 | 219.5 | 170 | 245 | -4.81**  |
| Liberty Island           | 8 | 223.5 | 218 | 268 | 10 | 219.5 | 190 | 255 | 10 | 215.5 | 154 | 233 | 10 | 215.0 | 178 | 245 | 10 | 208.5 | 170 | 232 | 10 | 208.0 | 173 | 246 | 10 | 201.5 | 153 | 221 | 10 | 195.0 | 157 | 220 | 10 | 192.5 | 180 | 227 | -3.74**  |
| Deepwater Ship Channel   | 7 | 235.0 | 228 | 264 | 9  | 239.0 | 222 | 264 | 9  | 226.0 | 188 | 262 | 9  | 219.0 | 177 | 265 | 10 | 228.5 | 182 | 260 | 10 | 222.0 | 170 | 240 | 10 | 201.5 | 166 | 231 | 10 | 197.0 | 175 | 232 | 10 | 213.5 | 168 | 243 | -4.3**   |
| Lower Cache Slough       | 7 | 244.0 | 228 | 276 | 8  | 244.0 | 223 | 268 | 9  | 239.0 | 188 | 264 | 8  | 235.5 | 177 | 268 | 10 | 230.5 | 182 | 262 | 10 | 223.5 | 170 | 261 | 10 | 208.5 | 165 | 237 | 10 | 208.0 | 176 | 236 | 10 | 218.5 | 168 | 245 | -4.72*** |
| <b>Confluence</b>        |   |       |     |     |    |       |     |     |    |       |     |     |    |       |     |     |    |       |     |     |    |       |     |     |    |       |     |     |    |       |     |     |    |       |     |     |          |
| Mallard Island           | 7 | 249.0 | 234 | 262 | 8  | 244.0 | 222 | 268 | 9  | 247.0 | 193 | 266 | 8  | 230.5 | 191 | 281 | 10 | 233.0 | 185 | 244 | 10 | 228.5 | 184 | 245 | 10 | 203.0 | 168 | 237 | 10 | 209.0 | 172 | 237 | 10 | 204.5 | 170 | 242 | -6.22**  |
| <b>Suisun Bay</b>        |   |       |     |     |    |       |     |     |    |       |     |     |    |       |     |     |    |       |     |     |    |       |     |     |    |       |     |     |    |       |     |     |    |       |     |     |          |
| Martinez                 | 2 | 255.0 | 255 | 255 | 2  | 238.0 | 229 | 247 | 1  | 221.0 | 221 | 221 | 1  | 244.0 | 244 | 244 | 4  | 246.5 | 202 | 253 | 4  | 242.0 | 238 | 252 | 4  | 243.5 | 204 | 266 | 6  | 238.5 | 199 | 250 | 6  | 223.5 | 177 | 246 | NS       |
